# Supplementary material
Source: Research Square preprint supplement (doi:10.21203/rs.3.rs-9754955/v1)
Supplement: Supplementary file 1 [file 767c589c72c1f85b56e9a2c7.xlsx]

## Sheet: Title page
“Genetic Architecture of Non-Syndromic Premature Ovarian Insufficiency: A Systematic Review.”
Amy V. Kaucher1, Evaggelia Alexopoulou2, Isa A. Olofsson1, Kevin Bourge1, Cathrine Voigt Dalgaard1,2, L. Kevin Lie1, Nathalie Friis Wang2, Morten Dunø3, Anja Pinborg2,4, Eva R. Hoffmann1
1 Department of Cellular and Molecular Medicine, Faculty of Health and Medical Sciences, University of Copenhagen, Copenhagen, Denmark.
2 The Fertility Clinic, Department of Gynecology, Fertility and Obstetrics, Copenhagen University Hospital – Rigshospitalet, Copenhagen, Denmark.
3 Department of Clinical Genetics, Copenhagen University Hospital – Rigshospitalet, Copenhagen, Denmark.
4 Department of Clinical Medicine, Faculty of Health and Medical Sciences, University of Copenhagen, Copenhagen, Denmark.
Table of Contents
	Supplementary Table S1. List of studies excluded during full text screening.
	Supplementary Table S2. Q-Genie or modified Q-Genie scores for hypothesis-free studies.
	Supplementary Table S3. Genes identified from hypothesis-free studies.
	Supplementary Table S4. Genes identified from candidate-gene studies.
	Supplementary Table S5. Patient details for moderate-evidence genes.
	Supplementary Table S6. Longform alignment of publicly available POI candidate gene lists with moderate-evidence genes.
	Supplementary Table S7. Overview of limited-evidence genes from hypothesis-free studies, along with confirmational candidate-gene studies.
	Supplementary Table S8. Phenotype and zygosity distribution for limited-evidence genes.
	Supplementary Table S9. Chromosome regions identified in hypothesis-free studies.

## Sheet: Supp Table S1
Supplementary Table S1. List of studies excluded during full text screening.
First author	Publication year	Exclusion reason	DOI (or other identifier, if DOI not provided)
Abali	2022	Not peer reviewed	DOI: 10.1159/000525606
Aboura	2009	Wrong patient population	DOI: 10.1210/jc.2009-0186
Abrams	2004	Wrong outcomes	DOI: 10.1111/j.0009-9163.2004.00255.x
Abu-Libdeh	2022	Not peer reviewed	Hormone Research in Paediatrics 2022;95(SUPPL 2):398-398
Agarwal	2019	Wrong patient population	DOI: 10.1007/s10815-019-01626-3
Akbari	2021	Not peer reviewed	International Journal of Reproductive BioMedicine / 2021;19(5 SUPPL 1):31-32
Akhavansales	2022	Wrong patient population	DOI: 10.18502/ijrm.v20i12.12561
Akhavansales	2021	Not peer reviewed	International Journal of Reproductive BioMedicine / 2021;19(5 SUPPL 1):129
Akin	2019	Not peer reviewed	DOI: 10.1159/000501868
Akin	2022	Wrong patient population	DOI: 10.1016/j.gim.2021.09.019
Alavi	2020	Wrong patient population	DOI: 10.1007/s00438-020-01663-z
Al-Azzawi	2011	Not peer reviewed	Climacteric / 2011;14(SUPPL. 1):103
Al-Azzawi	2011	Not peer reviewed	Climacteric / 2011;14(SUPPL. 1):102-103
Aldemir	2016	Wrong outcomes	DOI: 10.1016/j.genrep.2016.05.004
Al-Hinti	2007	Wrong patient population	DOI: 10.1097/WAD.0b013e31811ec130
Allen	2004	Wrong patient population	DOI: 10.1007/s00439-004-1086-x
Allen	2007	Wrong patient population	DOI: 10.1093/humrep/dem148
Allen	2014	Wrong patient population	DOI: 10.3389/fgene.2014.00260
Allen	2018	Wrong patient population	DOI: 10.3389/fgene.2018.00292
Allen	2018	Wrong patient population	DOI: 10.1016/j.fertnstert.2018.07.425
Allen	2021	Wrong patient population	DOI: 10.1038/s41436-021-01177-y
Allingham-Hawkins	1999	Wrong patient population	DOI: 10.1002/(SICI)1096-8628(19990402)83:4<322::AID-AJMG17>3.0.CO;2-B
Almeida	2009	Wrong patient population	Maturitas / 2009;63(SUPPL. 1):S123
Alvarez-Mora	2015	Wrong patient population	DOI: 10.1016/j.gene.2015.06.039
Alvarez-Mora	2018	Wrong patient population	DOI: 10.1111/cge.13257
AlvaroMercadal	2011	Not peer reviewed	DOI: 10.1093/humrep/26.s1.89
AlvaroMercadal	2012	Not peer reviewed	DOI: 10.1093/humrep/27.s2.87
Alves	2021	Not peer reviewed	DOI: 10.1093/humrep/deab130.568
Andreeva	2025	Wrong patient population	DOI: 10.3897/pharmacia.72.e147149
Anonymous	2023	Review/Meta-Analysis	DOI: 10.1038/s41591-022-02196-1
Anupama	2011	Wrong patient population	DOI: 10.1007/s13224-011-0008-9
Asadi	2018	Wrong patient population	DOI: 10.1016/j.gene.2018.07.034
Auclair	2013	Wrong outcomes	DOI: 10.1371/journal.pone.0078199
Aynaci	2019	Not peer reviewed	Erciyes Medical Journal / 2019;41(Supplement 1):23
Bachelot	2009	Wrong outcomes	DOI: 10.1530/EJE-09-0231
Bachelot	2010	Not peer reviewed	Endocrine Abstracts / 2010;20:P645
Baek	2021	Wrong patient population	DOI: 10.31083/j.ceog4806230
Baetens	2017	Not peer reviewed	Hormone Research in Paediatrics 2017;88():552-553
Baetens	2019	Not peer reviewed	DOI: 10.1038/s41431-018-0247-7
Bakhshalizadeh	2023	Wrong patient population	DOI: 10.1007/s00439-023-02563-z
Banerjee	1997	Wrong outcomes	DOI: 10.1017/s0001566000000477
Banks	2015	Not peer reviewed	Fertility and Sterility / 2015;104(3 SUPPL. 1):e111
Bao	2023	Wrong outcomes	DOI: 10.1186/s13048-023-01121-5
Barasoain	2013	Wrong patient population	DOI: 10.1016/j.gene.2013.03.032
Baronchelli	2012	Wrong outcomes	DOI: 10.1186/1755-8166-5-32
Barros	2020	Review/Meta-Analysis	DOI: 10.1097/j.pbj.0000000000000062
Bashamboo	2010	Review/Meta-Analysis	DOI: 10.1016/j.ando.2010.02.013
Bashamboo	2010	Not peer reviewed	Endocrine Abstracts / 2010;22:S11.1
Basly	2010	Not peer reviewed	Journal fur Reproduktionsmedizin und Endokrinologie / 2010;7(4):361-362
Beau	2016	Not peer reviewed	DOI: 10.1210/endo-meetings.2016.RE.3.FRI-192
Beke	2018	Wrong patient population	DOI: 10.1186/s12881-018-0634-5
Benayoun	2011	Wrong outcomes	DOI: 10.1093/hmg/ddr042
Bennett	2010	Wrong patient population	DOI: 10.1093/humrep/deq058
Berro	2015	Not peer reviewed	DOI: 10.1016/j.fertnstert.2015.07.784
Berro	2016	Not peer reviewed	Fertility and Sterility / 2016;105(2 SUPPL. 1):e14
Bertini	2012	Wrong patient population	DOI: 10.1016/j.gene.2012.04.071
Bertrand-Delepine	2020	Wrong patient population	DOI: 10.1016/j.rbmo.2019.10.002
Bione	1997	Not peer reviewed	American Journal of Human Genetics 1997;61(4):A11-A11
Bione	1998	Wrong outcomes	DOI: 10.1086/301761
Bione	2004	Wrong patient population	DOI: 10.1093/humrep/deh502
Bolt	2013	Not peer reviewed	Reproductive Sciences 2013;20(S3):170A-170A
Boros	2022	Wrong patient population	DOI: 10.1016/j.mito.2022.07.004
Bouhali	2011	Wrong outcomes	DOI: 10.1093/hmg/ddr166
Bouilly	2011	Not peer reviewed	Endocrine Reviews / 2011;32(3 Meeting Abstracts):
Bouilly	2014	Not peer reviewed	Endocrine Reviews / 2014;35(SUPPL. 3):
Burnham	2002	Not peer reviewed	American Journal of Human Genetics 2002;71(4):395-395
Cao	2021	Wrong patient population	DOI: 10.1093/molehr/gaab058
Casteleiro-Alves	2019	Not peer reviewed	Human Reproduction / 2019;34(SUPPL 1):i388-i389
Cen	2022	Wrong outcomes	DOI: 10.1093/biolre/ioac103
Chand	2007	Wrong outcomes	DOI: 10.1093/humrep/dem323
Chang	2024	Wrong patient population	DOI: 10.1016/j.ejogrb.2024.05.041
Chatterjee	2009	Wrong outcomes	DOI: 10.1093/humrep/dep296
Chen	2020	Not peer reviewed	DOI: 10.1111/jog.14463
Chen	2023	Review/Meta-Analysis	DOI: 10.1038/s41591-022-02196-1
Chen	2024	Wrong outcomes	DOI: 10.1186/s13048-024-01486-1
Chen	2024	Wrong outcomes	DOI: 10.3389/fendo.2024.1307944
Cho	2017	Wrong outcomes	DOI: 10.1371/journal.pone.0183479
Cloke	2016	Not peer reviewed	DOI: 10.1111/1471-0528.14114
Conway	1999	Wrong patient population	DOI: 10.1046/j.1365-2265.1999.00745.x
Cooper	2010	Not peer reviewed	DOI: 10.1007/978-1-60327-864-5_510.1007/978-1-60327-864-5
Dalprá	2001	Not peer reviewed	American Journal of Human Genetics 2001;69(4):316-316
Danilovich	2001	Not peer reviewed	Biology of Reproduction 2001;64():282-283
Davis	2001	Not peer reviewed	Human Reproduction 2001;16():210-210
Davison	1998	Wrong outcomes	DOI: 10.1093/humrep/13.11.3039
Davison	2000	Wrong outcomes	DOI: 10.1093/molehr/6.4.314
Delcour	2019	Wrong outcomes	DOI: 10.1038/s41436-018-0287-y
DiLeo	2011	Not peer reviewed	Climacteric / 2011;14(SUPPL. 1):230
Dorfman	1999	Wrong outcomes	DOI: 10.1093/humrep/14.10.2531
Du	2024	Wrong outcomes	DOI: 10.1186/s13048-024-01524-y
Duffin	2009	Wrong outcomes	DOI: 10.1093/molehr/gap065
Dunne	2018	Not peer reviewed	Irish Journal of Medical Science 2018;187():S187-S187
Epstein	2025	Wrong patient population	DOI: 10.1016/j.jpag.2025.06.001
Er	2021	Not peer reviewed	Hormone Research in Paediatrics 2021;94(SUPPL 1):43-43
Eshaghi	2021	Not peer reviewed	International Journal of Reproductive BioMedicine / 2021;19(5 SUPPL 1):112
Eskenazi	2020	Record cannot be found	Human Reproduction / 2020;35(SUPPL 1):i456
Estep	2011	Wrong outcomes	DOI: 10.1021/bi200280r
Farahzad	2022	Not peer reviewed	DOI: 10.1016/j.jpag.2022.01.108
Femi	2011	Not peer reviewed	Climacteric / 2011;14(SUPPL. 1):53-54
Feng	2022	Wrong outcomes	DOI: 10.1155/2022/5501346
Ferrarini	2021	Wrong patient population	DOI: 10.1186/s13048-021-00836-7
Fonseca	2014	Wrong outcomes	DOI: 10.1016/j.rbmo.2014.07.018
FOXL2StudyGroup	2002	Not peer reviewed	American Journal of Human Genetics 2002;71(4):324-324
França	2020	Review/Meta-Analysis	DOI: 10.1210/jendso/bvz037
Fu	2016	Wrong outcomes	DOI: 10.1371/journal.pone.0144285
Gao	2020	Wrong outcomes	DOI: 10.3892/ijmm.2019.4437
Gasic	2022	Wrong outcomes	DOI: 10.1007/s00335-022-09954-z
Gersak	2003	Wrong patient population	DOI: 10.1093/humrep/deg327
Gersak	2004	Wrong outcomes	DOI: 10.1093/humrep/deh496
Ghadami	2008	Wrong outcomes	DOI: 10.1093/molehr/gam077
Ghadami	2010	Wrong outcomes	DOI: 10.1093/molehr/gaq003
Gheldof	2018	Not peer reviewed	DOI: 10.1093/humrep/33.Supplement_1.1
Ghezelayagh	2013	Not peer reviewed	Iranian Journal of Reproductive Medicine / 2013;11(SUPPL. 1):57-58
Ghezelayagh	2013	Not peer reviewed	International Journal of Fertility and Sterility / 2013;7(SUPPL. 1):128
Guo	2022	Wrong outcomes	DOI: 10.18632/aging.203942
Guo	2023	Not peer reviewed	DOI: 10.1093/humrep/dead093.1027
Haller	2002	Not peer reviewed	Biology of Reproduction 2002;66():213-213
Hanna	2009	Wrong outcomes	DOI: 10.1093/humrep/dep007
Heddar	2021	Not peer reviewed	DOI: 10.1093/humrep/deab130.576
Heddar	2023	Not peer reviewed	DOI: 10.1093/humrep/dead093.369
HenarejosCastillo	2020	Not peer reviewed	Human Reproduction / 2020;35(SUPPL 1):i364
Henarejos-Castillo	2024	Wrong patient population	DOI: 10.1186/s12958-024-01325-4
Hernández-López	2020	Wrong outcomes	DOI: 10.1093/molehr/gaaa032
Hirano	2014	Not peer reviewed	Endocrine Reviews2014;35(3):
Hu	2024	Wrong patient population	DOI: 10.3390/antiox13080911
Huang	2020	Wrong outcomes	DOI: 10.1038/s41467-020-16718-3
Inagaki	2010	Wrong outcomes	DOI: 10.1016/j.mce.2010.05.017
Jabbar	2023	Wrong patient population	DOI: 10.47750/jptcp.2023.1092
Jaillard	2018	Wrong patient population	DOI: 10.1038/s10038-018-0433-z
Katari	2018	Wrong outcomes	DOI: 10.1093/humrep/dey012
Keshav	2000	Not peer reviewed	American Journal of Human Genetics 2000;67(4):390-390
Kim	2011	Not peer reviewed	Climacteric / 2011;14(SUPPL. 1):145-146
Knauff	2009	Not peer reviewed	Reproductive Sciences 2009;16(3):282A-282A
Knauff	2009	Not peer reviewed	DOI: 10.1093/humrep/dep705
Kovanci	2005	Not peer reviewed	Journal of the Society for Gynecological Investigation 2005;12(2):236A-236A
Lakhal	2009	Not peer reviewed	Hormone Research 2009;72():54-54
LavenJSE	2020	Review/Meta-Analysis	DOI: 10.1055/s-0040-1721796
Lechowska	2011	Wrong outcomes	DOI: 10.1007/s10815-011-9553-5
Ledig	2010	Review/Meta-Analysis	Journal fur Reproduktionsmedizin und Endokrinologie / 2010;7(4):363
Lee	2015	Wrong outcomes	DOI: 10.1038/ncomms8744
Lee	2016	Wrong patient population	DOI: 10.1016/j.ygeno.2016.10.006
Lee	2017	Not peer reviewed	DOI: 10.1016/j.maturitas.2017.03.154
Lekovic	2017	Wrong patient population	Human Reproduction / 2017;32(Supplement 1):i440
Lena	2021	Wrong outcomes	DOI: 10.1038/s41467-020-20669-0
Li	2018	Wrong outcomes	DOI: 10.1080/13697137.2018.1476967
Li	2021	Wrong outcomes	DOI: 10.1016/j.str.2021.05.006
Liu	2012	Not peer reviewed	DOI: 10.1016/j.fertnstert.2012.07.1085
Liu	2017	Not peer reviewed	Human Reproduction 2017;32():105-105
Liu	2018	Wrong outcomes	DOI: 10.1038/s41419-018-1196-3
Liu	2019	Wrong outcomes	DOI: 10.4103/2096-2924.268158
Liu	2021	Wrong patient population	DOI: 10.1089/gtmb.2020.0303
Liu	2023	Wrong outcomes	DOI: 10.1186/s13048-023-01266-3
Liu	2025	Wrong patient population	DOI: 10.1093/ckj/sfae388
Lorenzi	2020	Wrong patient population	DOI: 10.5935/1518-0557.20190065
Luoh	1997	Wrong outcomes	DOI: 10.1242/dev.124.11.2275
Ma	2014	Article Retracted	DOI: 10.1097/MD.0000000000000093
Machado-Ferreira	2004	Wrong patient population	DOI: 10.1002/ajmg.a.20585
Mahmoud	2019	Record cannot be found	DOI: 10.35124/bca.2019.19.2.3439
Mahmoud	2020	Wrong patient population	DOI: 10.24996/ijs.2020.61.3.6
Mansouri	2008	Wrong patient population	DOI: 10.1093/hmg/ddn274
Marić	2025	Wrong patient population	DOI: 10.1093/hmg/ddae197
Marinakis	2022	Wrong patient population	DOI: 10.1097/GME.0000000000001928
May-Panloup	2005	Wrong patient population	DOI: 10.1093/humrep/deh667
McGlacken-Byrne	2021	Not peer reviewed	DOI: 10.1159/000518849
McGlacken-Byrne	2021	Not peer reviewed	DOI: 10.1159/000518849
McMahon	2008	Wrong outcomes	DOI: 10.1210/en.2007-1550
Miao	2019	Wrong outcomes	DOI: 10.1038/s41419-019-1720-0
Miranda-Furtado	2018	Wrong outcomes	DOI: 10.1016/j.fertnstert.2018.04.017
Mirinezhad	2021	Wrong patient population	DOI: 10.22074/ijfs.2020.134688
Mirinezhad	2022	Wrong outcomes	DOI: 10.1186/s12905-021-01550-8
MoraleSabater	2021	Not peer reviewed	DOI: 10.1093/humrep/deab130.540
Moriwaki	2017	Wrong patient population	DOI: 10.1210/js.2016-1014
Moriwaki	2017	Not peer reviewed	Endocrine Reviews / 2017;38(3 Supplement 1):
Moumne	2008	Wrong outcomes	DOI: 10.1093/hmg/ddm373
Moumné	2005	Wrong outcomes	DOI: 10.1093/hmg/ddi383
Munch	2012	Not peer reviewed	DOI: 10.1177/1933719112442493
Nakagawa	2022	Wrong patient population	DOI: 10.1093/hmg/ddac023
Ni	2024	Wrong outcomes	DOI: 10.1093/biolre/ioad168
Nicol	2020	Wrong outcomes	DOI: 10.1093/biolre/ioaa146
Oddsson	2024	Wrong patient population	DOI: 10.1038/s41588-024-01885-6
Okutman	2019	Not peer reviewed	Human Reproduction / 2019;34(SUPPL 1):i382-i383
Omari	2015	Wrong outcomes	DOI: 10.1038/cddis.2015.95
Oprova	2023	Not peer reviewed	DOI: 10.1038/s41431-023-01338-4
Ottolenghi	2001	Not peer reviewed	American Journal of Human Genetics 2001;69(4):354-354
Padovano	2011	Wrong outcomes	DOI: 10.1242/jcs.088237
Pagano	2012	Not peer reviewed	DOI: 10.1016/S0020-7292%2812%2961278-8
Pan	2021	Wrong outcomes	DOI: 10.1007/s00438-020-01730-5
Parets	2017	Not peer reviewed	Fertility and Sterility / 2017;107(3 Supplement 1):e31
Parfitt	2017	Not peer reviewed	Human Reproduction / 2017;32(Supplement 1):i436-i437
Park	2020	Wrong patient population	DOI: 10.3390/jpm10040193
Patiño	2017	Wrong outcomes	DOI: 10.1080/19396368.2017.1291767
Patiño	2019	Wrong outcomes	DOI: 10.1002/humu.23667
Patsalis	2000	Not peer reviewed	Human Reproduction 2000;15():183-184
Perry	2013	Wrong patient population	DOI: 10.1093/hmg/dds551
Persani	2010	Not peer reviewed	Endocrine Abstracts / 2010;22:S11.4
Philibert	2012	Not peer reviewed	DOI: 10.1159/000343182
Prueitt	1999	Not peer reviewed	American Journal of Human Genetics 1999;65(4):A466-A466
Psychogios	2021	Not peer reviewed	DOI: 10.1016/S1096-7192%2821%2900426-1
Qin	2011	Wrong outcomes	DOI: 10.1186/1477-7827-9-158
Qin	2015	Not peer reviewed	DOI: 10.22074/ijfs.2015.4697
Rafaa	2020	Wrong patient population	DOI: 10.22099/mbrc.2020.36371.1477
Reddy	2008	Wrong outcomes	DOI: 10.1126/science.1152257
Renault	2020	Wrong outcomes	DOI: 10.1210/clinem/dgz226
Riera-Escamilla	2023	Not peer reviewed	DOI: 10.1101/2023.09.26.23296051
Rodríguez-Escribà	2023	Wrong outcomes	DOI: 10.1093/biolre/ioad008
Rossetti	2004	Wrong outcomes	DOI: 10.1038/sj.ejhg.5201186
Rossetti	2010	Not peer reviewed	Endocrine Abstracts / 2010;20:P636
Rossetti	2021	Not peer reviewed	DOI: 10.1210/jendso/bvab048.1553
Rotgers	2018	Not peer reviewed	Endocrine Reviews / 2018;39(2 Supplement 1):
Ruth	2021	Wrong patient population	DOI: 10.1038/s41586-021-03779-7
Rydze	2018	Not peer reviewed	Fertility and Sterility / 2018;110(4 SUPPL):e75
SadatEshaghi	2022	Wrong patient population	DOI: 10.18502/ijrm.v20i10.12268
Salumets	2014	Not peer reviewed	DOI: 10.1093/humrep/29.Supplement_1.1
Sánchez-Sáez	2020	Wrong outcomes	DOI: 10.1126/sciadv.abb1660
Sanghavi	2024	Wrong patient population	DOI: 10.1186/s43042-023-00471-5
Santos	2010	Not peer reviewed	DOI: 10.1159/000321348
Santos	2011	Not peer reviewed	Endocrine Reviews / 2011;32(3 Meeting Abstracts):
Sassi	2018	Not peer reviewed	DOI: 10.1093/humrep/33.Supplement_1.1
Satirapod	2020	Wrong outcomes	DOI: 10.18632/aging.103080
Sayban	2018	Wrong outcomes	DOI: 10.1016/j.mgene.2018.07.005
SchefflerGharieni	2019	Not peer reviewed	Human Reproduction / 2019;34(SUPPL 1):i395
Seliger	2015	Not peer reviewed	DOI: 10.1093/humrep/30.Supplement-1.1
Senterre	2023	Not peer reviewed	DOI: 10.1016/j.maturitas.2023.04.231
Settas	2014	Not peer reviewed	DOI: 10.1159/000365775
Settas	2015	Not peer reviewed	DOI: 10.1159/000437032
Shaker	2020	Wrong patient population	DOI: 10.37506/ijfmt.v14i4.11868
Shaker	2020	Not peer reviewed	Biochemical and Cellular Archives / 2020;20(Supplement2):3597-3601
Shekari	2022	Not peer reviewed	DOI: 10.1093/humrep/deac106.O-147
Shekari	2023	Wrong outcomes	DOI: 10.1038/s41591-023-02405-5
Sheng	2022	Wrong outcomes	DOI: 10.1016/j.ebiom.2021.103790
Shestakova	2015	Wrong outcomes	DOI: 10.3109/09513590.2015.1086516
Shiina	2006	Wrong outcomes	DOI: 10.1073/pnas.0506736102
Simpson	2010	Not peer reviewed	Reproduction, Fertility and Development / 2010;22(SUPPL. 1):46
Simpson	2014	Wrong outcomes	DOI: 10.1210/jc.2013-3949
Song	2018	Wrong patient population	DOI: 10.3389/fphar.2018.01224
Subramanian	2021	Wrong outcomes	DOI: 10.1093/molehr/gaaa080
Sugawa	2009	Wrong outcomes	DOI: 10.1016/j.fertnstert.2007.11.085
Sun	2023	Wrong outcomes	DOI: 10.1186/s12915-023-01549-7
Takahashi	2003	Wrong patient population	DOI: 10.1038/sj.ejhg.5200968
Thanatsis	2017	Not peer reviewed	Human Reproduction 2017;32():449-449
Tong	2010	Wrong patient population	DOI: 10.1016/j.fertnstert.2010.06.049
Tran	2019	Wrong outcomes	DOI: 10.1093/biolre/ioz089
Ullah	2021	Wrong patient population	DOI: 10.1007/s00439-021-02380-2
VanDooren	2018	Not peer reviewed	Human Reproduction 2018;33():414-415
Vujović	2013	Wrong outcomes	DOI: 10.2298/sarh1306344v
Wang	2010	Wrong patient population	DOI: 10.1016/j.rbmo.2010.04.013
Wang	2020	Wrong outcomes	DOI: 10.1038/s41419-020-2697-4
Wang	2020	Wrong outcomes	DOI: 10.1093/nar/gkaa127
Wang	2021	Wrong outcomes	DOI: 10.3389/fcell.2021.644135
Wang	2022	Wrong outcomes	DOI: 10.1038/s41467-022-33323-8
Watkins	2006	Wrong patient population	DOI: 10.1093/molehr/gal017
Wu	2023	Full text not available in English	DOI: 10.3724/zdxbyxb-2023-0468
Xi	2021	Not peer reviewed	Fertility and Sterility / 2021;116(3 SUPPL):e68
Yalcin	2024	Wrong patient population	DOI: 10.1007/s10815-024-03031-x
Yan	2018	Wrong outcomes	DOI: 10.1186/s12915-018-0541-4
Yang	2010	Wrong patient population	DOI: 10.1089/jwh.2008.1317
Yılmaz	2016	Wrong patient population	DOI: 10.5152/jtgga.2016.16035
Yoon	2009	Not peer reviewed	Fertility and Sterility / 2009;92(3 SUPPL. 1):S95
Yoon	2016	Not peer reviewed	Human Reproduction 2016;31():419-420
Yoon	2016	Not peer reviewed	DOI: 10.1080/13697137.2016.1242242
Yu	2013	Wrong outcomes	DOI: 10.1126/science.1244587
Yuan	2021	Wrong patient population	DOI: 10.1111/cge.14048
Yuan	2025	Wrong patient population	DOI: 10.1159/000544052
Zahed	2002	Wrong outcomes	DOI: 10.1034/j.1399-0004.2002.620410.x
Zariñán	2021	Wrong patient population	DOI: 10.1210/clinem/dgaa782
Zhang	2015	Not peer reviewed	Human Reproduction 2015;30():115-115
Zhao	2019	Wrong patient population	DOI: 10.1186/s13048-019-0595-0
Zhen	2014	Not peer reviewed	Human Reproduction 2014;29():106-106
Zheng	2019	Wrong outcomes	DOI: 10.1093/biolre/ioy245
Zhou	2023	Wrong outcomes	DOI: 10.1186/s13048-023-01252-9

## Sheet: Supp Table S2
Supplementary Table S2. Q-Genie or modified Q-Genie scores for hypothesis-free studies.
Reference	QA template	Controlled	Q1_rationale	Q2_phenotype	Q3_controls	Q4_technical	Q5_nontechnical	Q6_bias	Q7_power	Q8_planning	Q9_stats	Q10_assumptions	Q11_ conclusions	Total	Final score
Bayram et al., 2015	Modified Q-Genie	No	2	4	--	2	3	2	4	2	--	3	3.5	25.5	Poor
Bramble et al., 2016	Modified Q-Genie	Yes	4	5	3	3	2	2	3	3	--	3.5	4	32.5	Moderate
Caburet et al., 2012	Modified Q-Genie	Yes	3.5	4	3.5	4	3	3	3.5	3	--	3.5	3.5	34.5	Moderate
Cai et al., 2020	Modified Q-Genie	No	4	4.5	--	4	3	2.5	2.5	4.5	--	3.5	4.5	33	Moderate
Carlosama et al., 2017	Modified Q-Genie	Yes	3.5	3.5	4	2.5	2	2.5	4	2.5	--	3	3	30.5	Poor
Chen et al., 2018a	Modified Q-Genie	Yes	4	4	2.5	4	3	2	3	4	--	3	4	33.5	Moderate
Chen et al., 2020a	Modified Q-Genie	No	3	3	--	4.5	3	2.5	5	4	--	4.5	4.5	34	Moderate
Christofolini et al., 2025	Modified Q-Genie	Yes	2	4.5	2	4	3	2	1.5	4	--	3	3	29	Poor
Chu et al., 2021	Modified Q-Genie	Yes	4	2.5	2.5	2	2	2	3	2	--	4	4	28	Poor
Cozette et al., 2025	Modified Q-Genie	No	3.5	3.5	--	3	3	4	2.5	4	--	2.5	3	29	Poor
de Vries et al., 2014	Modified Q-Genie	Yes	4	3.5	3	2	2	2	3	2	--	2	3	26.5	Poor
Ding et al., 2024a	Modified Q-Genie	No	2	4	--	3.5	3	2.5	2.5	3	--	3	3	26.5	Poor
Fauchereau et al., 2016	Modified Q-Genie	Yes	4.5	5	3.5	4	3	2.5	3	4	--	3.5	4	37	Moderate
Felipe-Medina et al., 2020	Modified Q-Genie	Yes	3.5	2	2.5	4	2	2	3.5	4	--	4	4	31.5	Poor
Fouquet et al., 2017	Modified Q-Genie	Yes	4	4	3..5	3	2	2	3	3	--	3	4	28	Poor
França et al., 2017a	Modified Q-Genie	Yes	4	3	3.5	3.5	2	2.5	3.5	3	--	3.5	3.5	32	Poor
França et al., 2017b	Modified Q-Genie	Yes	3	4	3	4	3	2	3.5	4	--	3.5	3	33	Moderate
França et al., 2019a	Modified Q-Genie	Yes	4	4	2.5	2	2.5	2	4.5	2	--	3	4	30.5	Poor
Franca et al., 2022	Modified Q-Genie	Yes	4.5	5	3.5	4.5	4	2.5	3.5	4	--	4	3	38.5	Moderate
Goldberg et al., 2015	Modified Q-Genie	Yes	4.5	4	3	4	2.5	2	3	3	--	3.5	4	33.5	Moderate
Guo et al., 2017	Modified Q-Genie	Yes	3.5	3.5	3	2	2.5	2	4	3.5	--	3	3.5	30.5	Poor
Harrison et al., 2013	Modified Q-Genie	Yes	3	2.5	2.5	4	3	2	3	3	--	3	4	30	Poor
He et al., 2018a	Modified Q-Genie	No	3.5	3.5	--	2	2	2	2.5	2	--	3	3	23.5	Poor
Heddar et al., 2019	Modified Q-Genie	Yes	4	4.5	3	4	3	2	3.5	4	--	4	4	36	Moderate
Heddar et al., 2022b	Modified Q-Genie	No	4	5.5	--	3	3	3	2.5	4	--	3.5	4	32.5	Moderate
Hu et al., 2025a	Modified Q-Genie	Yes	2.5	3	3	3	3	4	4	3.5	--	4.5	5	35.5	Moderate
Jolly et al., 2019	Modified Q-Genie	No	2	2	--	3	2.5	2	3	2	--	3	3	22.5	Poor
Kang et al., 2008a	Q-Genie	Yes	3.5	3.5	2.5	2.5	3	2	1.5	3	3	2.5	3	30	Poor
Kang et al., 2008b	Q-Genie	Yes	4.5	4	3.5	3.5	2.5	2.5	3	3.5	3	3	4	37	Moderate
Kang et al., 2009	Q-Genie	Yes	3.5	3	2.5	3	2	2	2	2	2	2	3	27	Poor
Kasippillai et al., 2013	Modified Q-Genie	Yes	3.5	4	3.5	3	2.5	2	5	2.5	--	3.5	3	32.5	Moderate
Katari et al., 2015	Modified Q-Genie	Yes	4	3.5	3.5	4	2	2	3	3	--	3.5	4	32.5	Moderate
Ke et al., 2023	Modified Q-Genie	Yes	4.5	5	3.5	1.5	2	5.5	5.5	5	--	2	6	40.5	Good
Kline et al., 2025	Modified Q-Genie	No	3.5	4	--	3.5	3	2	1.5	4	--	3.5	3.5	28.5	Poor
Kline et al., 2026	Modified Q-Genie	No	4.5	4.5	--	2.5	3	3.5	1.5	2	--	4	5	30.5	Moderate
Knauff et al., 2009	Q-Genie	Yes	4.5	5	4.5	4.5	3	4	3.5	4	4.5	4	4	45.5	Good
Lacombe et al., 2006	Modified Q-Genie	Yes	4	3	3	4	3	3.5	4.5	3	--	4	4	36	Moderate
Le Quesne Stabej et al., 2016	Modified Q-Genie	No	4	4	--	4	3	2	2.5	3	--	3	3	28.5	Poor
Li et al., 2020b	Modified Q-Genie	No	3	5	--	2	2.5	2	4	2	--	4	3.5	28	Poor
Liao et al., 2011	Modified Q-Genie	Yes	4.5	4	2	3	2	2	2	4	--	3	3	29.5	Poor
Lokchine et al., 2025b	Modified Q-Genie	No	2.5	4	--	2	3	3	2.5	2	--	4.5	5	28.5	Poor
McGlacken-Byrne et al., 2022a	Modified Q-Genie	Yes	3	3.5	3	3	3.5	3.5	3.5	3	--	3	3.5	32.5	Moderate
McGlacken-Byrne et al., 2022b	Modified Q-Genie	Yes	2.5	4	2.5	4	3	2.5	3	4	--	4	4.5	34	Moderate
McGlacken-Byrne et al., 2025	Modified Q-Genie	No	4.5	5	--	4	3	3	4	4	--	4	5	36.5	Good
McGuire et al., 2011	Modified Q-Genie	No	4	4	--	4	3	4	3	4	--	3	3	32	Moderate
Mishra et al., 2024	Modified Q-Genie	No	2.5	4	--	2	2	2	2.5	2	--	3	3	23	Poor
Norling et al., 2014b	Modified Q-Genie	Yes	5	5	2.5	4	3	2.5	2.5	3	--	4	3	34.5	Moderate
Oldenburg et al., 2008	Modified Q-Genie	Yes	3	4	4	3.5	2.5	3	4.5	3.5	--	4	3.5	35.5	Moderate
Pan et al., 2025b	Modified Q-Genie	No	4.5	4	--	3	3	3	2.5	2.5	--	4.5	4.5	31.5	Moderate
Pyun et al., 2012a	Q-Genie	Yes	4	2	3.5	3	2	3	3	2	2	3	3	30.5	Poor
Qin et al., 2012c	Q-Genie	Yes	4.5	4	3.5	4	3	3	4	2.5	4.5	4	4	41	Moderate
Qin et al., 2015	Modified Q-Genie	Yes	4	4.5	3.5	2	2	2	4	4	--	3	4	33	Moderate
Ren et al., 2018	Modified Q-Genie	Yes	3.5	4	3	2	2	2	3	3	--	2	3	27.5	Poor
Sakka et al., 2022	Modified Q-Genie	Yes	3	4.5	3	3	4	2	3.5	4	--	4	3.5	34.5	Moderate
Sassi et al., 2021	Modified Q-Genie	Yes	4.5	3.5	3	4	3	3	3	4	--	2	4	34	Moderate
Smirin-Yosef et al., 2017	Modified Q-Genie	Yes	4	3.5	3.5	2	2	2	3.5	2	--	4	3	29.5	Poor
Song et al., 2024	Modified Q-Genie	Yes	3	3.5	3	3.5	3	2	4.5	3	--	3.5	4	33	Moderate
Sun et al., 2025	Modified Q-Genie	No	2	3	--	3	3	2	3.5	2	--	3	4	25.5	Poor
Tang et al., 2024	Modified Q-Genie	Yes	4.5	3.5	3	4	3	4	5.5	4	--	5	5	41.5	Good
Tšuiko et al., 2016	Q-Genie	Yes	4.5	5	5.5	4	4	4	4.5	4	3	4	4	46.5	Good
Tucker et al., 2019	Modified Q-Genie	No	3.5	5	--	5	2	3	3.5	4	--	4	3.5	33.5	Moderate
Turkyilmaz et al., 2022	Modified Q-Genie	No	4.5	5	--	3.5	3	4.5	3	4	--	4	3.5	35	Moderate
Wang et al., 2017	Modified Q-Genie	Yes	2	4	3.5	3	2	2	4	2	--	3	4	29.5	Poor
Wang et al., 2019	Modified Q-Genie	No	3	3.5	--	2	2	2	3	2	--	3	3.5	24	Poor
Wood-Trageser et al., 2014	Modified Q-Genie	Yes	4.5	4	3.5	4	2	2	4.5	4	--	3	4	35.5	Moderate
Xu et al., 2023	Modified Q-Genie	No	3.5	5	--	3.5	3.5	4	2.5	4	--	3	2.5	31.5	Moderate
Yoo et al., 2023	Modified Q-Genie	No	2.5	4.5	--	2	2	2	2.5	2	--	3	3	23.5	Poor
Yuan et al., 2019	Modified Q-Genie	Yes	2.5	3.5	2.5	2	2.5	2	4	2	--	3	4	28	Poor
Yuan et al., 2022	Modified Q-Genie	No	3	3.5	--	1.5	1.5	2	1.5	2	--	2	3	20	Poor
Zhang et al., 2018a	Modified Q-Genie	Yes	4	4	3.5	3	2	3	4.5	3	--	3.5	4	34.5	Moderate
Zhang et al., 2021	Modified Q-Genie	Yes	3	3.5	2.5	2	3	2	5	2	--	3	3.5	29.5	Poor
Zhang et al., 2022a	Modified Q-Genie	Yes	3.5	5	3.5	2	2.5	3	3.5	3.5	--	3	4	33.5	Moderate
Zhang et al., 2022b	Modified Q-Genie	Yes	2	4.5	4	4	3.5	2	2.5	3	--	3	4	32.5	Moderate
Zhang et al., 2023	Modified Q-Genie	No	3.5	5	--	4.5	5.5	3	2.5	3	--	3	3.5	33.5	Moderate
Zhe et al., 2019	Modified Q-Genie	Yes	4	5	2.5	3.5	2.5	2.5	3.5	3	--	3	4	33.5	Moderate
Zielen et al., 2018	Modified Q-Genie	Yes	2	4	2.5	2	2	2	3.5	2	--	3	3	26	Poor

## Sheet: Supp Table S3
Supplementary Table S3. Full list of genes identified in hypothesis-free studies (alphabetical order).
Official gene symbol	Number of independent hypothesis-free studies identifying gene	Number of unrelated families for this gene across hypothesis-free studies	Total number of patients for this gene across hypothesis-free studies	Ancestry of patients	Phenotype of patients	Reference
AARS2	1	1	1	Near Eastern	PA	Turkyilmaz et al., 2022
AASDH	1	1	2	East Asian	SA	Li et al., 2020b
AASS	1	1	2	East Asian	SA	Pan et al., 2025b
ABCA13	1	1	2	East Asian	SA	Wang et al., 2017
ABCA5	1	1	2	Unspecified	SA	Zhang et al., 2022b
ABCA9	1	1	2	Unspecified	SA	Chu et al., 2021
ABCB11	1	1	2	East Asian	SA	Wang et al., 2017
ABCD2	1	1	2	American	PA	Ren et al., 2018
ACOT12	1	1	2	East Asian	SA	Li et al., 2020b
ACSF3	1	1	1	Near Eastern	PA	Le Quesne Stabej et al., 2016
ADAM21	1	1	2	East Asian	SA	Wang et al., 2017
ADCY2	1	1	2	East Asian	SA	Li et al., 2020b
ADGRV1	1	1	2	East Asian	SA	Pan et al., 2025b
AK2	1	1	2	Unspecified	SA	Zhang et al., 2022b
AKAP13	1	1	3	East Asian	SA	Zhang et al., 2018a
AKAP5	1	1	2	East Asian	SA	Xu et al., 2023
ALG10	1	1	2	East Asian	SA	Wang et al., 2017
ALMS1	1	1	2	East Asian	SA	Li et al., 2020b
ALOX12	1	3	3	Unspecified	Mixed	Ke et al., 2023
AMHR2	2	2	2	Near Eastern and unspecified	SA	Tucker et al., 2019 Turkyilmaz et al., 2022
ANKRD36C	1	4	4	East Asian	Unspecified	Cai et al., 2020
APC2	1	1	1	Near Eastern	SA	Kline et al., 2025
AQP7	1	1	2	Unspecified	SA	Zhang et al., 2022b
ARHGAP39	1	1	2	East Asian	SA	Li et al., 2020b
ARHGEF38	1	1	2	East Asian	SA	Wang et al., 2017
ARID3A	1	1	2	East Asian	SA	Li et al., 2020b
ARRB1	1	1	1	Unspecified	PA	McGlacken-Byrne et al., 2025
ASB11	1	1	2	East Asian	PA	He et al., 2018a
ASB18	1	1	2	East Asian	SA	Wang et al., 2017
ASTN2	1	1	2	Unspecified	SA	Zhang et al., 2022b
ATF7IP	1	1	2	East Asian	SA	Wang et al., 2017
ATP5MF-PTCD1	1	1	2	East Asian	SA	Li et al., 2020b
ATP8A1	1	1	2	Unspecified	SA	Zhang et al., 2022b
AUTS2	1	1	2	East Asian	SA	Li et al., 2020b
BAZ2A	1	1	2	East Asian	SA	Xu et al., 2023
BCL6	1	1	1	Near Eastern	PA	Chen et al., 2018a
BEND4	1	1	2	East Asian	SA	Pan et al., 2025b
BICDL2	1	1	2	East Asian	SA	Pan et al., 2025b
BLNK	1	1	2	East Asian	SA	Li et al., 2020b
BMP15	1	1	2	Unspecified	SA	Zhang et al., 2022b
BMP6	1	2	2	Unspecified	SA	Ke et al., 2023
BMP8B	1	1	1	Near Eastern	SA	Turkyilmaz et al., 2022
BMPR1B	1	1	1	Unspecified	PA	Tucker et al., 2019
BMPR2	1	1	2	Near Eastern	SA	Turkyilmaz et al., 2022
BNC1	1	1	3	East Asian	SA	Zhang et al., 2018a
BRCA2	1	1	1	Near Eastern	PA	Heddar et al., 2022b
BRD1	1	1	2	East Asian	SA	Li et al., 2020b
BRD8	1	1	2	East Asian	SA	Li et al., 2020b
BUB1B	1	1	5	East Asian	SA	Chen et al., 2020a
C1QA	1	1	2	East Asian	SA	Wang et al., 2017
C3	1	1	1	Near Eastern	Unspecified	Jolly et al., 2019
C4orf33	1	1	1	Unspecified	PA	McGlacken-Byrne et al., 2025
C5	1	1	2	East Asian	SA	Wang et al., 2017
CACNA1B	1	1	2	Unspecified	SA	Zhang et al., 2022b
CACNG2	1	1	2	East Asian	SA	Wang et al., 2017
CAMSAP2	1	1	1	Unspecified	Unspecified	Tucker et al., 2019
CAPN10	1	1	2	Unspecified	SA	Zhang et al., 2022b
CAST	1	1	2	East Asian	SA	Li et al., 2020b
CCDC137	1	1	1	Near Eastern	PA	Wood-Trageser et al., 2014
CCDC141	1	1	2	East Asian	SA	Wang et al., 2017
CCDC150	1	1	1	Near Eastern	SA	Heddar et al., 2022b
CCDC185	1	1	1	Near Eastern	SA	Heddar et al., 2022b
CCDC71L	1	1	2	East Asian	SA	Wang et al., 2017
CCDC80	1	1	2	East Asian	SA	Li et al., 2020b
CCL26	1	1	1	East Asian	PA	Zhang et al., 2023
CCNK	1	1	2	East Asian	SA	Wang et al., 2017
CCNT2	1	1	1	Unspecified	SA	Tucker et al., 2019
CDC7	1	1	1	Unspecified	SA	Tucker et al., 2019
CDHR2	1	1	2	East Asian	SA	Wang et al., 2017
CENPE	1	1	3	Mixed	SA	Heddar et al., 2022b
CENPI	1	1	1	Unspecified	SA	Tucker et al., 2019
CEP85L	1	1	2	Near Eastern	PA	Wood-Trageser et al., 2014
CES1	1	1	2	Unspecified	SA	Zhang et al., 2022b
CHD7	1	1	1	Near Eastern	Unspecified	Jolly et al., 2019
CHKB	1	1	2	East Asian	SA	Xu et al., 2023
CIBAR1	1	1	2	Unspecified	SA	Zhang et al., 2022b
CKAP5	1	2	4	East Asian	SA	Hu et al., 2025a
CLDN23	1	1	2	East Asian	SA	Wang et al., 2017
CLDN34	1	1	2	East Asian	PA	He et al., 2018a
CLEC2A	1	1	2	East Asian	SA	Xu et al., 2023
CNKSR1	1	1	2	East Asian	SA	Li et al., 2020b
CNN2	2	7	8	East Asian and unspecified	Mixed	Cai et al., 2020 Zhang et al., 2022b
CNTNAP4	1	1	2	East Asian	SA	Li et al., 2020b
COL16A1	1	1	2	Unspecified	SA	Zhang et al., 2022b
COL5A2	1	1	2	East Asian	SA	Wang et al., 2017
COL6A2	1	1	2	Near Eastern	PA	Smirin-Yosef et al., 2017
CORO2A	1	1	2	East Asian	SA	Xu et al., 2023
CPEB1	1	2	2	Unspecified	SA	Ke et al., 2023
CRYZ	1	1	2	East Asian	SA	Xu et al., 2023
CUL7	1	1	2	East Asian	SA	Li et al., 2020b
CWH43	1	1	2	East Asian	SA	Xu et al., 2023
CXCR3	1	1	2	East Asian	SA	Li et al., 2020b
DCP1A	1	1	2	American	SA	Carlosama et al., 2017
DDI1	1	1	1	Unspecified	SA	Tucker et al., 2019
DHX35	1	1	2	East Asian	SA	Pan et al., 2025b
DIO1	1	1	2	East Asian	SA	Xu et al., 2023
DIS3	1	1	1	Near Eastern	SA	Kline et al., 2025
DKKL1	1	7	7	East Asian	Unspecified	Cai et al., 2020
DNAH1	1	1	1	Unspecified	SA	Tucker et al., 2019
DNAH14	1	1	1	Near Eastern	PA	Wood-Trageser et al., 2014
DNAH17	1	1	1	Near Eastern	PA	Wood-Trageser et al., 2014
DNAH7	1	1	2	East Asian	SA	Li et al., 2020b
DNAJC10	1	1	2	Unspecified	SA	Zhang et al., 2022b
DND1	1	1	1	Unspecified	PA	McGlacken-Byrne et al., 2025
DST	2	2	4	East Asian	SA	Pan et al., 2025b Xu et al., 2023
EDNRB	1	1	2	East Asian	SA	Li et al., 2020b
EIF2B3	1	1	1	Near Eastern	SA	Turkyilmaz et al., 2022
EIF4ENIF1	1	1	6	European	SA	Kasippillai et al., 2013
ELAVL2	1	1	2	European	SA	Heddar et al., 2022b
ELOVL2	1	1	2	East Asian	SA	Li et al., 2020b
EPHA6	1	1	2	East Asian	SA	Li et al., 2020b
EPHA8	1	1	2	Unspecified	SA	Zhang et al., 2022b
ERBB3	1	1	2	East Asian	SA	Li et al., 2020b
ERCC6	2	2	4	East Asian and Near Eastern	Mixed	Qin et al., 2015 Turkyilmaz et al., 2022
ERCC6L2	1	1	1	Unspecified	PA	Tucker et al., 2019
ERN2	1	1	2	East Asian	SA	Xu et al., 2023
ESRRB	1	1	1	Unspecified	PA	Tucker et al., 2019
ESRRG	1	2	2	Unspecified	Mixed	Tucker et al., 2019
EXOSC10	1	1	1	European	PA	Kline et al., 2026
FAM171A1	1	1	2	East Asian	SA	Xu et al., 2023
FAM174B	1	1	2	East Asian	SA	Xu et al., 2023
FANCL	1	1	2	Near Eastern	PA	Turkyilmaz et al., 2022
FANCM	2	2	4	European	Mixed	Fouquet et al., 2017 Heddar et al., 2022b
FBH1	1	1	2	East Asian	SA	Li et al., 2020b
FBXO40	1	1	2	East Asian	SA	Xu et al., 2023
FBXO42	1	1	2	East Asian	SA	Xu et al., 2023
FDXR	1	1	2	East Asian	SA	Li et al., 2020b
FER1L6	2	2	2	Near Eastern	Mixed	Turkyilmaz et al., 2022 Wood-Trageser et al., 2014
FIGLA	1	1	2	East Asian	PA	Yuan et al., 2019
FIGNL1	1	1	2	Near Eastern	SA	Turkyilmaz et al., 2022
FKBP15	1	1	2	East Asian	SA	Li et al., 2020b
FOXK2	1	1	1	Unspecified	SA	Tucker et al., 2019
FRG1	1	7	7	East Asian	Unspecified	Cai et al., 2020
FSHR	5	6	9	Central/South Asian, East Asian, European, Latin American, and Near Eastern	PA	Bramble et al., 2016 França et al., 2017b Heddar et al., 2022b Katari et al., 2015 Yoo et al., 2023
G6PC2	1	1	2	East Asian	SA	Li et al., 2020b
GABRQ	1	1	2	East Asian	SA	Wang et al., 2017
GALC	1	1	2	Near Eastern	PA	Smirin-Yosef et al., 2017
GALNTL5	1	1	2	East Asian	SA	Li et al., 2020b
GALT	1	1	1	Near Eastern	Unspecified	Jolly et al., 2019
GART	1	1	2	East Asian	SA	Xu et al., 2023
GDPD2	1	1	2	East Asian	SA	Li et al., 2020b
GPSM1	1	3	3	East Asian	Unspecified	Cai et al., 2020
GRB10	1	1	2	East Asian	SA	Wang et al., 2017
GREB1	1	1	2	East Asian	SA	Pan et al., 2025b
GREM1	1	1	1	Unspecified	SA	Tucker et al., 2019
GRM6	1	1	2	East Asian	SA	Pan et al., 2025b
GTF2F1	1	1	2	East Asian	SA	Xu et al., 2023
H1-8	1	2	2	Unspecified	SA	Ke et al., 2023
HAL	1	1	2	East Asian	SA	Xu et al., 2023
HCAR2	1	1	2	East Asian	SA	Li et al., 2020b
HDHD3	1	1	2	East Asian	SA	Li et al., 2020b
HDLBP	1	1	2	East Asian	SA	Wang et al., 2017
HELB	1	1	2	East Asian	SA	Pan et al., 2025b
HELQ	1	1	1	Near Eastern	SA	Heddar et al., 2022b
HERC1	1	1	1	Unspecified	SA	Tucker et al., 2019
HFM1	1	1	2	East Asian	SA	Zhe et al., 2019
HIBADH	1	1	2	East Asian	SA	Pan et al., 2025b
HMMR	1	4	4	Unspecified	Mixed	Ke et al., 2023
HPS1	1	1	2	East Asian	SA	Li et al., 2020b
HRCT1	1	1	2	East Asian	SA	Xu et al., 2023
HROB	1	1	1	Near Eastern	PA	Heddar et al., 2022b
HSD17B1	1	5	5	Unspecified	SA	Ke et al., 2023
HSF2BP	1	1	2	Near Eastern	SA	Felipe-Medina et al., 2020
HSPA4L	1	1	2	East Asian	SA	Xu et al., 2023
ICE1	1	1	2	East Asian	SA	Li et al., 2020b
IGSF10	2	4	4	Near Eastern and unspecified	SA	Jolly et al., 2019 Turkyilmaz et al., 2022
INSRR	1	1	1	Unspecified	PA	Ding et al., 2024a
IPP	1	1	2	East Asian	SA	Xu et al., 2023
IQGAP3	1	1	2	East Asian	SA	Li et al., 2020b
ITPR2	1	1	2	American	PA	Ren et al., 2018
KANSL3	1	1	2	East Asian	SA	Xu et al., 2023
KASH5	2	4	5	East Asian and unspecified	SA	Ke et al., 2023 Zhang et al., 2022a
KAT6A	1	1	2	Near Eastern	PA	Smirin-Yosef et al., 2017
KAZN	1	1	2	East Asian	SA	Wang et al., 2017
KCNJ12	1	1	2	Unspecified	SA	Zhang et al., 2022b
KCNJ18	1	1	2	Unspecified	SA	Zhang et al., 2022b
KCNQ3	1	1	7	East Asian	SA	Zhang et al., 2021
KCNQ4	1	1	7	East Asian	SA	Zhang et al., 2021
KDM1A	1	1	1	Near Eastern	PA	Chen et al., 2018a
KDM3A	1	1	2	East Asian	PA	Yuan et al., 2019
KHDRBS1	1	1	2	East Asian	SA	Wang et al., 2017
KIFAP3	1	1	2	East Asian	SA	Xu et al., 2023
KMT2C	1	1	2	Unspecified	SA	Zhang et al., 2022b
KRT18	1	1	2	Unspecified	SA	Zhang et al., 2022b
KRT72	1	1	2	Unspecified	SA	Zhang et al., 2022b
KRTAP13-4	1	1	2	East Asian	SA	Li et al., 2020b
KSR1	1	1	2	East Asian	SA	Wang et al., 2017
LAMC1	1	1	2	East Asian	SA	Xu et al., 2023
LAT	1	1	2	Unspecified	SA	Chu et al., 2021
LCK	1	1	2	American	SA	Carlosama et al., 2017
LGR4	1	3	3	Unspecified	SA	Ke et al., 2023
LHCGR	1	1	2	Central/South Asian	PA	Zielen et al., 2018
LINC00862	1	1	2	Unspecified	SA	Chu et al., 2021
LINS1	1	1	2	Near Eastern	PA	Smirin-Yosef et al., 2017
LMO7	2	6	6	East Asian	Mixed	Cai et al., 2020 Zhang et al., 2023
LRP2	1	1	2	East Asian	SA	Li et al., 2020b
LRRC17	1	1	2	East Asian	PA	He et al., 2018a
LRRD1	1	1	2	East Asian	SA	Xu et al., 2023
LSP1	2	2	4	East Asian	SA	Li et al., 2020b Wang et al., 2017
LURAP1L	1	1	2	East Asian	SA	Li et al., 2020b
MAN1A2	1	1	2	East Asian	SA	Xu et al., 2023
MANBA	1	1	2	East Asian	SA	Wang et al., 2017
MAP3K20	1	1	2	East Asian	SA	Li et al., 2020b
MAP3K4	1	1	2	East Asian	PA	Yuan et al., 2019
MCM8	3	5	6	Near Eastern and unspecified	Mixed	Heddar et al., 2022b Jolly et al., 2019 Mishra et al., 2024
MCM9	6	9	11	European, Near Eastern, and unspecified	Mixed (predominantly PA)	Ding et al., 2024a Fauchereau et al., 2016 Goldberg et al., 2015 Jolly et al., 2019 Tucker et al., 2019 Wood-Trageser et al., 2014
MCMDC2	1	2	2	Unspecified	SA	Ke et al., 2023
MCTP2	1	1	2	East Asian	SA	Li et al., 2020b
MED17	1	1	2	East Asian	SA	Wang et al., 2017
MEF2A	1	1	1	Unspecified	PA	McGlacken-Byrne et al., 2025
MEIOSIN	1	2	2	Unspecified	SA	Ke et al., 2023
MGA	2	39	39	East Asian and Near Eastern	Mixed (predominantly SA)	Kline et al., 2025 Tang et al., 2024
MINK1	1	1	2	East Asian	SA	Li et al., 2020b
MMS22L	1	1	1	Unspecified	PA	McGlacken-Byrne et al., 2025
MND1	1	1	2	Near Eastern	Unspecified	Jolly et al., 2019
MOV10L1	1	1	2	East Asian	SA	Xu et al., 2023
MPP7	1	1	2	East Asian	SA	Xu et al., 2023
MPPE1	1	1	2	East Asian	SA	Wang et al., 2017
MRE11A	1	1	1	Unspecified	Unspecified	Tucker et al., 2019
MRPS22	2	3	4	Near Eastern	Mixed (predominantly PA)	Chen et al., 2018a Jolly et al., 2019
MS4A4A	1	1	2	East Asian	SA	Li et al., 2020b
MSH4	2	3	4	Latin American and Near Eastern	Mixed	Carlosama et al., 2017 Turkyilmaz et al., 2022
MSH5	2	2	3	East Asian and Near Eastern	SA	Guo et al., 2017 Turkyilmaz et al., 2022
MST1R	1	4	4	Unspecified	Mixed predominantly SA)	Ke et al., 2023
MTBP	1	1	2	East Asian	SA	Li et al., 2020b
MTCH2	1	1	2	Unspecified	SA	Zhang et al., 2022b
MTF1	1	1	1	Near Eastern	SA	Kline et al., 2025
MUC2	1	1	7	East Asian	SA	Zhang et al., 2021
MUC20	1	1	2	East Asian	SA	Li et al., 2020b
MUC5B	1	1	1	Near Eastern	PA	Wood-Trageser et al., 2014
MUSK	1	1	2	East Asian	SA	Li et al., 2020b
MYH6	1	1	2	Unspecified	SA	Zhang et al., 2022b
MYO1E	1	1	2	East Asian	SA	Wang et al., 2017
MYO7B	1	1	2	East Asian	SA	Wang et al., 2017
NBN	1	2	2	Near Eastern	Mixed	Turkyilmaz et al., 2022
NCOA3	1	1	2	East Asian	SA	Xu et al., 2023
NDST1	1	1	1	Near Eastern	PA	Le Quesne Stabej et al., 2016
NDUFA7	1	1	2	East Asian	SA	Xu et al., 2023
NEBL	1	1	2	East Asian	SA	Li et al., 2020b
NEK8	1	1	1	Unspecified	PA	Tucker et al., 2019
NOBOX	3	3	4	European, Latin American, and Near Eastern	Mixed (predominantly PA)	França et al., 2017a Jolly et al., 2019 Sassi et al., 2021
NOTCH1	1	1	2	East Asian	SA	Li et al., 2020b
NOTCH2	1	1	2	East Asian	SA	Li et al., 2020b
NR6A1	1	1	2	East Asian	SA	Li et al., 2020b
NRG2	1	1	1	Near Eastern	SA	Heddar et al., 2022b
NSD1	1	1	2	East Asian	SA	Li et al., 2020b
NTNG2	1	1	2	East Asian	SA	Wang et al., 2017
NTRK3	1	1	1	Unspecified	SA	Tucker et al., 2019
NUP107	2	2	3	Latin American and unspecified	Mixed (predominantly PA)	Ren et al., 2018 Tucker et al., 2019
NUP155	1	1	1	Unspecified	SA	Tucker et al., 2019
NUP43	1	3	3	Unspecified	SA	Ke et al., 2023
OBSCN	1	1	2	Unspecified	SA	Chu et al., 2021
OR2T29	1	5	5	East Asian	Unspecified	Cai et al., 2020
OR8I2	1	1	2	East Asian	SA	Li et al., 2020b
OSCP1	1	1	2	East Asian	SA	Li et al., 2020b
OTOGL	1	1	2	East Asian	SA	Xu et al., 2023
OTOL1	1	1	2	East Asian	SA	Xu et al., 2023
OXER1	1	1	2	Central/South Asian	PA	Zielen et al., 2018
PABPC3	1	6	6	East Asian	Unspecified	Cai et al., 2020
PADI6	1	1	1	Near Eastern	Unspecified	Jolly et al., 2019
PALM2AKAP2	1	1	2	East Asian	SA	Li et al., 2020b
PARP15	1	1	2	East Asian	SA	Wang et al., 2017
PARVB	1	1	2	East Asian	SA	Wang et al., 2017
PAX4	1	1	2	Unspecified	SA	Zhang et al., 2022b
PCDHGB2	1	1	2	East Asian	SA	Li et al., 2020b
PCIF1	1	1	1	Unspecified	PA	McGlacken-Byrne et al., 2025
PCLO	1	1	2	Central/South Asian	PA	Zielen et al., 2018
PCNT	1	1	2	Near Eastern	PA	Smirin-Yosef et al., 2017
PDC	1	1	2	East Asian	SA	Xu et al., 2023
PDCD4	1	1	2	East Asian	SA	Xu et al., 2023
PDE11A	1	1	2	East Asian	SA	Xu et al., 2023
PDPN	1	1	2	East Asian	SA	Wang et al., 2017
PDZD7	1	1	2	East Asian	SA	Pan et al., 2025b
PGPEP1L	1	1	2	East Asian	SA	Li et al., 2020b
PHLPP2	1	1	2	East Asian	SA	Xu et al., 2023
PLCZ1	1	1	2	East Asian	SA	Pan et al., 2025b
PLEKHN1	1	1	2	East Asian	SA	Xu et al., 2023
PLXND1	1	1	1	Near Eastern	PA	Chen et al., 2018a
PM20D2	1	1	2	Unspecified	SA	Zhang et al., 2022b
PMM2	1	1	2	Near Eastern	SA	Heddar et al., 2022b
PNLIPRP1	1	1	2	East Asian	PA	Yuan et al., 2019
PNPLA7	1	1	1	Near Eastern	Unspecified	Jolly et al., 2019
POF1B	1	1	1	Unspecified	PA	Ding et al., 2024a
POLR3A	1	1	2	East Asian	SA	Li et al., 2020b
POLR3H	1	2	4	American	PA	França et al., 2019a
PORCN	1	1	2	East Asian	SA	Li et al., 2020b
POU5F1	1	1	1	Unspecified	SA	Sun et al., 2025
PPM1B	1	2	2	Unspecified	Mixed	Ke et al., 2023
PPRC1	1	1	7	East Asian	SA	Zhang et al., 2021
PRDM1	1	3	3	Unspecified	SA	Ke et al., 2023
PRDM7	1	1	2	East Asian	SA	Wang et al., 2017
PREPL	1	1	1	Unspecified	PA	Tucker et al., 2019
PREX1	1	1	2	East Asian	SA	Li et al., 2020b
PRICKLE3	1	1	2	East Asian	SA	Li et al., 2020b
PRIM2	1	1	2	East Asian	SA	Xu et al., 2023
PRIMA1	1	1	2	East Asian	SA	Wang et al., 2017
PRKD1	1	1	1	Near Eastern	Unspecified	Jolly et al., 2019
PRNP	1	1	2	East Asian	SA	Li et al., 2020b
PRSS1	1	1	2	Unspecified	SA	Zhang et al., 2022b
PRUNE1	1	1	2	East Asian	SA	Li et al., 2020b
PSMC3IP	2	2	2	Near Eastern and unspecified	Mixed	Ding et al., 2024a Jolly et al., 2019
PSPH	2	10	11	East Asian and unspecified	Mixed	Cai et al., 2020 Zhang et al., 2022b
PTGIS	1	1	2	East Asian	SA	Li et al., 2020b
PTPN4	1	1	2	East Asian	SA	Li et al., 2020b
PTPRQ	1	1	2	Near Eastern	PA	Smirin-Yosef et al., 2017
PXDNL	1	1	2	Near Eastern	PA	Smirin-Yosef et al., 2017
PYGB	1	1	2	Unspecified	SA	Zhang et al., 2022b
RAB33A	1	1	2	East Asian	SA	Li et al., 2020b
RABL6	1	1	2	East Asian	SA	Li et al., 2020b
RAD50	1	1	1	Unspecified	SA	Tucker et al., 2019
RAD51B	2	2	3	Latin American and Near Eastern	Mixed	Franca et al., 2022 Kline et al., 2025
RAD51C	1	1	1	Unspecified	SA	Tucker et al., 2019
RAI2	1	1	2	East Asian	SA	Li et al., 2020b
RALGPS1	2	2	4	East Asian	Mixed	Pan et al., 2025b Yuan et al., 2019
RAPSN	1	1	2	East Asian	SA	Xu et al., 2023
REC8	1	1	1	Unspecified	SA	Tucker et al., 2019
RELN	1	1	2	East Asian	PA	Yuan et al., 2019
RET	1	1	2	East Asian	SA	Li et al., 2020b
RFWD3	1	2	2	Unspecified	SA	Ke et al., 2023
RGPD4	1	1	2	East Asian	PA	Yuan et al., 2019
RGSL1	1	1	2	East Asian	SA	Xu et al., 2023
RND2	1	1	2	East Asian	SA	Li et al., 2020b
RNF111	1	1	3	East Asian	SA	Song et al., 2024
RNF169	1	1	2	European	PA	Heddar et al., 2022b
ROR2	1	1	2	Unspecified	SA	Zhang et al., 2022b
RORA	1	1	2	Unspecified	SA	Zhang et al., 2022b
RPS6KA5	1	1	2	East Asian	SA	Wang et al., 2017
RXFP3	1	1	1	Unspecified	PA	McGlacken-Byrne et al., 2025
SALL4	2	4	4	East Asian and Near Eastern	SA	Turkyilmaz et al., 2022 Wang et al., 2019
SBK2	1	1	2	East Asian	SA	Wang et al., 2017
SCUBE1	1	3	3	East Asian	Unspecified	Cai et al., 2020
SDK1	1	1	2	East Asian	SA	Li et al., 2020b
SEC13	1	1	2	East Asian	SA	Wang et al., 2017
SEMA3D	1	1	2	East Asian	SA	Li et al., 2020b
SEMA5B	1	1	2	East Asian	SA	Xu et al., 2023
SENP2	1	1	2	East Asian	SA	Li et al., 2020b
SEPTIN1	1	1	1	East Asian	PA	Zhang et al., 2023
SERPINB6	1	1	2	Unspecified	SA	Zhang et al., 2022b
SETBP1	1	1	2	East Asian	SA	Zhang et al., 2022a
SH2D2A	1	1	7	East Asian	SA	Zhang et al., 2021
SHCBP1	1	1	2	East Asian	SA	Pan et al., 2025b
SHOC1	1	6	6	Unspecified	SA	Ke et al., 2023
SHROOM2	1	1	2	Near Eastern	PA	Smirin-Yosef et al., 2017
SIM2	1	1	2	East Asian	SA	Xu et al., 2023
SIPA1	1	1	2	East Asian	SA	Li et al., 2020b
SKA2	1	1	2	East Asian	SA	Xu et al., 2023
SKOR2	1	1	2	Unspecified	SA	Chu et al., 2021
SLC1A7	1	1	2	East Asian	SA	Wang et al., 2017
SLC25A12	1	1	2	East Asian	SA	Xu et al., 2023
SLC25A29	1	1	2	Unspecified	SA	Zhang et al., 2022b
SLC25A5	1	1	2	Unspecified	SA	Zhang et al., 2022b
SLC27A1	1	1	2	East Asian	SA	Li et al., 2020b
SLC28A1	1	1	2	American	SA	Carlosama et al., 2017
SLC9B1	1	1	2	East Asian	SA	Wang et al., 2017
SLIT3	1	1	2	East Asian	SA	Xu et al., 2023
SLITRK2	1	1	2	East Asian	SA	Li et al., 2020b
SLX4	1	3	3	Unspecified	SA	Ke et al., 2023
SNHG28	1	1	2	East Asian	SA	Wang et al., 2017
SOHLH1	2	3	6	Near Eastern and unspecified	Mixed (predominantly PA)	Bayram et al., 2015 Jolly et al., 2019
SOX3	1	1	1	Unspecified	PA	Tucker et al., 2019
SPACA3	1	1	2	East Asian	SA	Wang et al., 2017
SPATA33	1	1	1	Near Eastern	PA	Heddar et al., 2022b
SPIDR	2	2	5	Near Eastern	Mixed	Sakka et al., 2022 Smirin-Yosef et al., 2017
SSH1	1	1	1	Unspecified	PA	Tucker et al., 2019
SSTR1	1	1	2	East Asian	SA	Xu et al., 2023
ST6GALNAC1	1	1	1	Near Eastern	PA	Wood-Trageser et al., 2014
STAG1	1	1	1	Unspecified	Unspecified	Tucker et al., 2019
STAG3	4	5	8	East Asian, European, and Near Eastern	PA	He et al., 2018a Heddar et al., 2019 Heddar et al., 2022b Le Quesne Stabej et al., 2016
STRA8	1	1	1	Unspecified	PA	Ke et al., 2023
STX18	1	1	2	East Asian	SA	Pan et al., 2025b
SUN2	1	1	2	East Asian	SA	Xu et al., 2023
SVIL	1	1	2	East Asian	SA	Li et al., 2020b
SWI5	1	1	1	Near Eastern	PA	Heddar et al., 2022b
SWSAP1	1	1	1	Sub-Saharan African	PA	Lokchine et al., 2025b
SYCE1	1	1	2	Near Eastern	PA	de Vries et al., 2014
SYCP3	1	1	2	East Asian	SA	Xu et al., 2023
SYDE2	1	1	2	American	SA	Carlosama et al., 2017
TARS3	1	1	2	East Asian	SA	Pan et al., 2025b
TAS1R1	2	2	4	East Asian and unspecified	SA	Li et al., 2020b Zhang et al., 2022b
TAX1BP1	1	1	2	East Asian	SA	Wang et al., 2017
TBC1D26	1	4	4	East Asian	Unspecified	Cai et al., 2020
TEKT4	1	1	2	East Asian	PA	Yuan et al., 2019
TENM4	1	1	2	East Asian	SA	Li et al., 2020b
TG	1	1	1	Near Eastern	Unspecified	Jolly et al., 2019
TGFB1I1	1	1	2	Unspecified	SA	Zhang et al., 2022b
THAP2	1	1	2	American	PA	Ren et al., 2018
TLDC2	1	1	2	East Asian	SA	Xu et al., 2023
TLR1	1	1	2	Unspecified	SA	Zhang et al., 2022b
TM6SF2	1	1	2	East Asian	SA	Li et al., 2020b
TNFRSF11B	1	1	2	East Asian	SA	Wang et al., 2017
TNRC6B	1	1	2	East Asian	SA	Wang et al., 2017
TNXB	1	1	2	Central/South Asian	PA	Katari et al., 2015
TP63	2	3	3	Unspecified	PA	Ding et al., 2024a Tucker et al., 2019
TPSAB1	1	8	8	East Asian	Unspecified	Cai et al., 2020
TRIM4	2	2	4	East Asian	PA	He et al., 2018a Yuan et al., 2019
TRIM50	1	1	2	Unspecified	SA	Zhang et al., 2022b
TRIM62	1	1	1	Near Eastern	PA	Chen et al., 2018a
TRIM63	1	1	2	East Asian	SA	Li et al., 2020b
TUFM	1	1	1	East Asian	PA	Zhang et al., 2023
TWNK	1	1	1	Unspecified	PA	Ding et al., 2024a
UBR4	1	1	1	Unspecified	PA	Tucker et al., 2019
UBXN11	1	1	2	Unspecified	SA	Chu et al., 2021
UNC45A	1	1	2	East Asian	SA	Li et al., 2020b
UNC79	1	1	2	East Asian	SA	Wang et al., 2017
USP15	1	1	2	East Asian	SA	Xu et al., 2023
USP53	1	2	2	Unspecified	Mixed	Tucker et al., 2019
WDR17	1	1	2	East Asian	SA	Wang et al., 2017
WDR60	1	1	2	East Asian	SA	Li et al., 2020b
WDR64	1	1	2	East Asian	SA	Li et al., 2020b
WWP2	1	1	2	East Asian	SA	Li et al., 2020b
YTHDC2	1	2	3	Central/South Asian	PA	McGlacken-Byrne et al., 2022a
ZAR1	1	6	6	Unspecified	SA	Ke et al., 2023
ZBP1	1	1	2	East Asian	SA	Li et al., 2020b
ZC2HC1C	1	1	2	East Asian	SA	Li et al., 2020b
ZFYVE19	1	1	2	East Asian	SA	Li et al., 2020b
ZNF484	1	1	2	East Asian	SA	Xu et al., 2023
ZNF7	1	1	2	East Asian	SA	Wang et al., 2017
ZNF777	1	1	2	East Asian	SA	Wang et al., 2017
ZNF790	1	1	2	East Asian	SA	Li et al., 2020b
ZNF804B	1	1	1	Near Eastern	PA	Le Quesne Stabej et al., 2016
ZP3	1	3	3	Unspecified	SA	Ke et al., 2023
ZSWIM7	2	2	3	Near Eastern and unspecified	PA	Christofolini et al., 2025 McGlacken-Byrne et al., 2022b

## Sheet: Supp Table S4
Supplementary Table S4. Full list of genes identified in candidate-gene studies (alphabetical order).
Official gene symbol	Number of independent candidate-gene studies identifying gene	Number of patients associated with this gene across all candidate-gene studies	Reference for candidate-gene studies
AARS2	3	13	Heddar et al., 2022b Ke et al., 2023 Zhou et al., 2019
ABRAXAS1	2	4	Heddar et al., 2022b Xu et al., 2019
ACAD9	1	2	Ke et al., 2023
ACE	1	*	Jung et al., 2013
ACKR3	1	1	Bestetti et al., 2021
ADAMTS1	3	8	Bestetti et al., 2021 Gorsi et al., 2022 Veneziano et al., 2025
ADAMTS16	2	3	Patiño et al., 2017a Rossetti et al., 2021
ADAMTS19	2	4	Fonseca et al., 2015 Veneziano et al., 2025
ADAMTS4	1	1	Rossetti et al., 2021
ADAMTS5	2	3	Bestetti et al., 2021 Rossetti et al., 2021
ADAMTS6	1	1	Bestetti et al., 2021
ADAMTSL1	1	2	Jin et al., 2020
ADAMTSL3	1	1	Tšuiko et al., 2016
AFF2	2	2	Bestetti et al., 2021 Gorsi et al., 2022
AFP	1	1	Bestetti et al., 2021
AGAP3	1	4	Al-Agha et al., 2018
AGRN	1	1	Rossetti et al., 2021
AGTR2	1	1	Veneziano et al., 2025
AIRE	4	10	Illés et al., 2024 Ke et al., 2023 Portnoi et al., 2018 Tang and Yu, 2020
AKAP9	1	1	Rossetti et al., 2021
ALOX12B	1	1	Ke et al., 2023
AMFR	1	1	Bestetti et al., 2019
AMH	6	17	Abed et al., 2018 Alvaro Mercadal et al., 2015 Gorsi et al., 2022 Heddar et al., 2022b Luo et al., 2023 McGlacken-Byrne et al., 2025
AMHR2	6	12	Heddar et al., 2022b Li et al., 2016 Luo et al., 2023 Shen et al., 2021 Veneziano et al., 2025 Zhen and Qiao, 2014
ANAPC1	1	1	Rossetti et al., 2021
ANKRD31	5	9	Gorsi et al., 2022 Ke et al., 2023 McGlacken-Byrne et al., 2025 Wang et al., 2021 Wang et al., 2025
AP3B2	1	1	Tšuiko et al., 2016
APC	1	1	Bestetti et al., 2019
APC2	2	3	Gorsi et al., 2022 Rossetti et al., 2021
APLF	1	4	Gorsi et al., 2022
AR	5	17	Heddar et al., 2022b Long et al., 2024 Panda et al., 2011 Rossetti et al., 2021 Veneziano et al., 2025
ARFGAP3	1	1	Tang and Yu, 2020
ASTL	1	1	Pervin et al., 2025
AT1R	1	*	Jung et al., 2013
ATG2A	2	2	Bestetti et al., 2021 Rossetti et al., 2021
ATG4C	1	2	Rossetti et al., 2021
ATG7	4	4	Bestetti et al., 2021 Heddar et al., 2022b McGlacken-Byrne et al., 2025 Patiño et al., 2017a
ATG9A	2	3	Heddar et al., 2022b Pervin et al., 2025
ATG9B	1	1	Bestetti et al., 2021
ATM	10	30	Cozette et al., 2025 França et al., 2020 Gorsi et al., 2022 Heddar et al., 2022b Illés et al., 2024 Ke et al., 2023 Liu et al., 2020 McGlacken-Byrne et al., 2025 Pervin et al., 2025 Rossetti et al., 2021
ATR	1	2	Rossetti et al., 2021
ATRX	1	1	Gorsi et al., 2022
BBS9	2	4	Tang and Yu, 2020 Veneziano et al., 2025
BCL2	1	1	Gorsi et al., 2022
BDP1	1	1	Gorsi et al., 2022
BLM	5	13	Gorsi et al., 2022 Heddar et al., 2022b Ke et al., 2023 McGlacken-Byrne et al., 2025 Rossetti et al., 2021
BMAL1	1	1	Bestetti et al., 2021
BMP15	31	105	Afkhami et al., 2022 Al-ajoury et al., 2015 Bestetti et al., 2019 Bouilly et al., 2016 Cohen et al., 2025 Demain et al., 2022 Di Pasquale et al., 2006 Dixit et al., 2006b Eskenazi et al., 2021 Ferrarini et al., 2013 França et al., 2020 Heddar et al., 2022b Hervé et al., 2025 Hyon et al., 2016 Jeong et al., 2004 Ke et al., 2023 Kumar et al., 2017 Laissue et al., 2006 Lakhal et al., 2009 Luo et al.…
BMP4	1	1	Bestetti et al., 2019
BMP5	1	1	Patiño et al., 2017a
BMP6	1	1	Bestetti et al., 2021
BMP8B	3	4	França et al., 2020 McGlacken-Byrne et al., 2025 Tang and Yu, 2020
BMPER	1	1	Patiño et al., 2017a
BMPR1A	2	3	Heddar et al., 2022b Patiño et al., 2017a
BMPR1B	3	11	Gorsi et al., 2022 Heddar et al., 2022b Patiño et al., 2017a
BMPR2	6	19	Fonseca et al., 2015 França et al., 2020 Heddar et al., 2022b Luo et al., 2023 McGlacken-Byrne et al., 2025 Tang and Yu, 2020
BNC1	11	17	Almatrafi et al., 2024 Bestetti et al., 2019 Bestetti et al., 2021 Chen et al., 2020b Heddar et al., 2022b Ke et al., 2023 Liu et al., 2020 McGlacken-Byrne et al., 2025 Pan et al., 2025a Tsabai et al., 2025a Veneziano et al., 2025
BNC2	1	1	Heddar et al., 2022b
BOD1L1	1	1	Gorsi et al., 2022
BRAT1	1	2	Gorsi et al., 2022
BRCA1	2	2	Gorsi et al., 2022 Rossetti et al., 2021
BRCA2	5	18	Caburet et al., 2021 Gorsi et al., 2022 Heddar et al., 2022b Ke et al., 2023 McGlacken-Byrne et al., 2025
BRD2	1	1	Patiño et al., 2017a
BRD3	1	1	Bestetti et al., 2021
BRDT	1	1	Bestetti et al., 2021
BRIP1	3	4	Gorsi et al., 2022 He et al., 2025 Yang et al., 2023
BRSK1	4	3	Heddar et al., 2022b Mirinezhad et al., 2024 Qin et al., 2012b Veneziano et al., 2025
BRWD1	1	1	Bestetti et al., 2021
BTBD1	2	2	Bestetti et al., 2019 Chen et al., 2020b
BUB1B	2	2	Ke et al., 2023 McGlacken-Byrne et al., 2025
C10orf90	1	1	Gorsi et al., 2022
C14orf39	4	6	Fan et al., 2021 Gorsi et al., 2022 Hou et al., 2022 Ke et al., 2023
C15orf40	2	2	Chen et al., 2020b Tšuiko et al., 2016
C1orf146	1	1	Qi et al., 2023
CAPZA1	1	1	Bestetti et al., 2019
CASP2	1	2	Morales et al., 2022
CASP3	1	1	Gorsi et al., 2022
CASTOR3P	1	1	Gorsi et al., 2022
CAV1	2	3	Heddar et al., 2022b Huang et al., 2018
CCNB1IP1	1	1	Rossetti et al., 2021
CD109	1	1	Alvarez-Mora et al., 2020
CDK7	1	1	Gorsi et al., 2022
CDKN1B	3	4	Jiao et al., 2017 Ojeda et al., 2011 Veneziano et al., 2025
CENPF	1	1	Gorsi et al., 2022
CHD1L	1	2	Gorsi et al., 2022
CHD7	3	3	Er et al., 2024 Gorsi et al., 2022 Pervin et al., 2025
CHEK1	1	1	Guo et al., 2025
CHEK2	2	2	Bestetti et al., 2021 Rossetti et al., 2021
CITED2	1	1	Fonseca et al., 2012b
CKAP5	1	5	Hu et al., 2025a
CLPP	6	13	Al-Agha et al., 2018 Heddar et al., 2022b Ke et al., 2023 McGlacken-Byrne et al., 2025 Shen et al., 2021 Yuan et al., 2023
CNOT6	1	1	Tang and Yu, 2020
COL4A6	2	3	França et al., 2020 Shen et al., 2021
COL6A1	1	1	Rossetti et al., 2021
COL6A2	1	4	Rossetti et al., 2021
COMT	2	*	Cordts et al., 2014 Qin et al., 2017
COX10	2	3	Heddar et al., 2022b Ke et al., 2023
CPEB1	6	9	Bestetti et al., 2019 França et al., 2020 Jiao et al., 2020 Rouen et al., 2022 Tsabai et al., 2025a Tšuiko et al., 2016
CPEB3	1	1	Gorsi et al., 2022
CPZ	1	2	Gorsi et al., 2022
CRIM1	1	1	Bestetti et al., 2019
CSMD1	1	2	Morales et al., 2022
CXCL12	1	*	Wang et al., 2011a
CXCR4	1	1	Patiño et al., 2017a
CYP17A1	3	2	Bestetti et al., 2021 Qin et al., 2017 Shen et al., 2021
CYP19A1	3	3	Heddar et al., 2022b Bestetti et al., 2021 Kim et al., 2011b
CYP1A1	1	*	Qin et al., 2017
CYP21A2	1	1	Rossetti et al., 2021
CYP26B1	2	4	Patiño et al., 2017a Tang and Yu, 2020
CYP2E1	2	3	Bestetti et al., 2019 Tšuiko et al., 2016
DACH2	1	2	Illés et al., 2024
DAZL	4	7	França et al., 2020 Illés et al., 2024 Tung et al., 2006a Tung et al., 2006b
DCAF17	3	4	Gorsi et al., 2022 McGlacken-Byrne et al., 2025 Tsabai et al., 2025a
DCP2	1	1	Gorsi et al., 2022
DDX1	1	1	Bestetti et al., 2019
DDX11	1	2	Morales et al., 2022
DHCR24	1	1	Rossetti et al., 2021
DHRS11	1	1	Tang and Yu, 2020
DIAPH2	2	3	Bestetti et al., 2019 Rouen et al., 2022
DIS3	1	2	Johnstone et al., 2023
DLL1	1	2	Morales et al., 2022
DMC1	6	25	Eskenazi et al., 2021 He et al., 2018b Jiao et al., 2017 Mandon-Pépin et al., 2008 McGlacken-Byrne et al., 2025 Veneziano et al., 2025
DMRT2	1	2	Rouen et al., 2022
DMRT3	2	2	Bestetti et al., 2021 Rossetti et al., 2021
DNAH5	1	12	Veneziano et al., 2025
DNAH6	2	5	Liu et al., 2020 Shen et al., 2021
DPPA2	1	1	Bestetti et al., 2021
DST	1	1	McGlacken-Byrne et al., 2025
DUSP22	1	6	Veneziano et al., 2025
EEF2	2	2	Bestetti et al., 2019 Gorsi et al., 2022
EFCAB13	1	4	Al-Agha et al., 2018
EFNA5	1	2	Morales et al., 2022
EIF2B2	9	18	Cozette et al., 2025 Gorsi et al., 2022 Illés et al., 2024 Ke et al., 2023 Liu et al., 2020 Pervin et al., 2025 Shen et al., 2021 Tsabai et al., 2025a Tucker et al., 2018
EIF2B3	2	2	Jin et al., 2020 Liu et al., 2020
EIF2B4	3	6	Heddar et al., 2022b Illés et al., 2024 Liu et al., 2020
EIF2B5	2	4	Pervin et al., 2025 Rouen et al., 2022
EIF4ENIF1	6	9	Shang et al., 2022 Cozette et al., 2025 Ding et al., 2024b França et al., 2020 Gorsi et al., 2022 McGlacken-Byrne et al., 2025
ELAVL2	1	1	Bestetti et al., 2019
EPB41L2	1	1	Rouen et al., 2022
ERBB3	1	1	Rossetti et al., 2021
ERBB4	1	1	Rossetti et al., 2021
ERCC2	4	3	França et al., 2020 Gorsi et al., 2022 Kali et al., 2022 Tang and Yu, 2020
ERCC6	12	30	Allen-Brady et al., 2025 Cozette et al., 2025 Gu et al., 2025 Heddar et al., 2022b Jiao et al., 2017 Jin et al., 2020 Long et al., 2024 Ke et al., 2023 Kuang et al., 2022 Luo et al., 2023 Shen et al., 2021 Tang and Yu, 2020
ESR1	10	10	Bouilly et al., 2016 Bretherick et al., 2008 Cordts et al., 2012 Heddar et al., 2022b Liu et al., 2013a Livshyts et al., 2013 M’Rabet et al., 2012 McGlacken-Byrne et al., 2025 Qin et al., 2012b Yoon et al., 2010
ESR2	1	3	Heddar et al., 2022b
EWSR1	1	**	Wang et al., 2025
EXO1	4	7	Jiao et al., 2017 Ke et al., 2023 Luo et al., 2020 McGlacken-Byrne et al., 2025
F5	1	1	Pervin et al., 2025
FANCA	8	13	Bestetti et al., 2021 Heddar et al., 2022b Ke et al., 2023 Liu et al., 2020 Rossetti et al., 2021 Tang and Yu, 2020 Tucker et al., 2024 Yang et al., 2019b
FANCC	3	4	Bestetti et al., 2021 Ke et al., 2023 Veneziano et al., 2025
FANCD2	2	2	Allen-Brady et al., 2025 Gorsi et al., 2022
FANCF	2	3	Gorsi et al., 2022 McGlacken-Byrne et al., 2025
FANCG	5	6	Heddar et al., 2022b Ke et al., 2023 Long et al., 2024 Patiño et al., 2017a Veneziano et al., 2025
FANCI	1	2	Cao et al., 2024
FANCL	6	11	França et al., 2020 Ke et al., 2023 McGlacken-Byrne et al., 2025 Patiño et al., 2017a Tang and Yu, 2020 Yang et al., 2020
FANCM	9	21	Allen-Brady et al., 2025 Bakhshalizadeh et al., 2024a Gorsi et al., 2022 Heddar et al., 2022b Ke et al., 2023 Jaillard et al., 2020a Long et al., 2024 McGlacken-Byrne et al., 2025 Veneziano et al., 2025
FCN3	1	3	Mehrjooy et al., 2021
FDXR	1	4	Al-Agha et al., 2018
FER1L6	1	1	Jin et al., 2020
FETUB	1	2	Alvarez-Mora et al., 2020
FGFR1	1	2	Gündüz et al., 2024
FGFR2	1	1	Patiño et al., 2017a
FIGLA	15	30	Bouilly et al., 2016 Chen et al., 2018b Cattoni et al., 2020 Cozette et al., 2025 Er et al., 2024 Eskenazi et al., 2021 Gorsi et al., 2022 Jiao et al., 2017 Ke et al., 2023 Luo et al., 2023 Mei et al., 2021 Rossetti et al., 2021 Tanikawa et al., 2025 Tosh et al., 2015 Zhao et al., 2008
FIGNL1	1	1	McGlacken-Byrne et al., 2025
FLNC	1	1	Gündüz et al., 2024
FMN2	2	4	J. Li et al., 2022 Tšuiko et al., 2016
FNDC4	1	*	Mirinezhad et al., 2024
FOXD4L5	1	4	Al-Agha et al., 2018
FOXL2	15	47	Eskenazi et al., 2021 Bodega et al., 2004 Bouilly et al., 2016 Gu et al., 2025 Harris et al., 2002 Heddar et al., 2022b Jordan et al., 2024b Ke et al., 2023 Laissue et al., 2009 Liu et al., 2020 Luo et al., 2023 Ni et al., 2010 Shen et al., 2021 Tsabai et al., 2025a Veneziano et al., 2025
FOXO1	2	2	Watkins et al., 2006 Veneziano et al., 2025
FOXO3	4	19	Cozette et al., 2025 Wang et al., 2010b Veneziano et al., 2025 Watkins et al., 2006
FOXO4	1	1	McGlacken-Byrne et al., 2025
FOXP3	1	*	Zhong et al., 2021
FSD2	1	1	Tšuiko et al., 2016
FSHB	1	1	McGlacken-Byrne et al., 2025
FSHR	33	87	Aittomäki et al., 1995 Achrekar et al., 2010 Beau et al., 1998 Cooper et al., 2025 Cordts et al., 2015 da Fonte Kohek et al., 1998 Doherty et al., 2002 Eskenazi et al., 2021 França et al., 2020 Gorsi et al., 2022 Gündüz et al., 2024 He et al., 2019 Heddar et al., 2022b Jaillard et al., 2020a Jiao et al., 2017 Kanaan et al., 2023 Ke et al., 2023 Liu et al., 1998 Liu et al., 2017 Liu et al., 2019 L…
FYN	1	1	Bestetti et al., 2021
FZD4	1	1	Gorsi et al., 2022
FZD6	1	1	Bestetti et al., 2019
GABRB2	1	1	Bestetti et al., 2019
GALT	7	25	Bestetti et al., 2021 Bouilly et al., 2016 Cozette et al., 2025 Heddar et al., 2022b Illés et al., 2024 Ke et al., 2023 Long et al., 2024
GATA4	2	4	França et al., 2020 Patiño et al., 2017a
GCM2	1	1	Alvarez-Mora et al., 2020
GDF9	27	58	Almatrafi et al., 2024 Atli et al., 2025 Bouilly et al., 2016 Dixit et al., 2005 Eskenazi et al., 2021 França et al., 2018 França et al., 2020 Gorsi et al., 2022 Heddar et al., 2022b Illés et al., 2024 Jaillard et al., 2020a Jiao et al., 2017 Jordan et al., 2024a Ke et al., 2023 Kovanci et al., 2007 Laissue et al., 2006 Long et al., 2024 Luo et al., 2023 Ma et al., 2015 McGlacken-Byrne et al., 20…
GHR	2	3	Liu et al., 2020 McGlacken-Byrne et al., 2025
GJA1	1	1	Gorsi et al., 2022
GJA4	5	6	Bachelot et al., 2018 Gündüz et al., 2024 McGlacken-Byrne et al., 2025 Patiño et al., 2017a Pervin et al., 2025
GLI1	1	1	Bestetti et al., 2021
GLO1	1	2	Morales et al., 2022
GNAS	3	11	Heddar et al., 2022b Ke et al., 2023 Pervin et al., 2025
GPR137C	1	1	Rossetti et al., 2021
GPR3	3	7	Hyon et al., 2016 Kovanci et al., 2008 Zhou et al., 2010
GREM1	2	2	McGlacken-Byrne et al., 2025 Patiño et al., 2017a
GREM2	1	1	Rydze et al., 2021
GRIA1	1	1	Bestetti et al., 2019
GTF2F1	1	2	Tan et al., 2023
GTF2IRD2B	1	4	Al-Agha et al., 2018
HARS2	5	8	França et al., 2020 Gorsi et al., 2022 Heddar et al., 2022b Ke et al., 2023 Yang et al., 2019a
HAUS6	1	1	Gorsi et al., 2022
HDAC5	1	1	Rossetti et al., 2021
HDGFL3	1	1	Chen et al., 2020b
HELQ	6	8	Bakhshalizadeh et al., 2024b França et al., 2020 Gorsi et al., 2022 Heddar et al., 2022b Jiao et al., 2017 McGlacken-Byrne et al., 2025
HFM1	12	26	Eskenazi et al., 2021 Gorsi et al., 2022 Gündüz et al., 2024 Heddar et al., 2022b Jin et al., 2020 Ke et al., 2023 Liu et al., 2020 Luo et al., 2023 Okutman et al., 2021 Pu et al., 2016 Tucker et al., 2022a Zeng et al., 2023
HK3	8	15	Alvarez-Mora et al., 2020 França et al., 2020 Heddar et al., 2022b Patiño et al., 2017a Qin et al., 2012b Rossetti et al., 2021 Tang and Yu, 2020 Veneziano et al., 2025
HNRNPK	1	1	Gorsi et al., 2022
HOMER2	1	1	Chen et al., 2020b
HOXA1	1	2	Morales et al., 2022
HROB	2	2	Pervin et al., 2025 Tucker et al., 2022a
HS6ST1	1	1	Almatrafi et al., 2024
HS6ST2	1	3	Illés et al., 2024
HSD17B4	3	6	Gorsi et al., 2022 Heddar et al., 2022b Veneziano et al., 2025
HSD3B1	1	2	Morales et al., 2022
HSF2BP	2	4	Ke et al., 2023 Li et al., 2021
HTRA3	1	1	Patiño et al., 2017a
ID1	1	1	Rossetti et al., 2021
IGF2R	1	1	Bestetti et al., 2021
IGSF10	2	7	Long et al., 2024 McGlacken-Byrne et al., 2025
IL1B	1	1	Gorsi et al., 2022
INHA	13	32	Alvarez-Mora et al., 2020 Christofolini et al., 2017 Corre et al., 2009 Dixit et al., 2004 Fallahian et al., 2009 Harris et al., 2005 Hassan et al., 2012 Kim et al., 2011a Marozzi et al., 2002 Shelling et al., 2000 Woad et al., 2009 Zargar et al., 2020 Zhou et al., 2010
INHBB	3	3	Dixit et al., 2004 Hyon et al., 2016 Veneziano et al., 2025
INHBC	1	1	Patiño et al., 2017a
INSL3	2	2	França et al., 2020 McGlacken-Byrne et al., 2025
IPO4	1	1	Patiño et al., 2017a
IRS4	1	1	McGlacken-Byrne et al., 2025
JAG1	1	2	Morales et al., 2022
JAK2	1	1	Bestetti et al., 2021
KASH5	1	1	Wu et al., 2022
KDR	2	1	Bestetti et al., 2021 Rah et al., 2012a
KHDRBS1	2	2	Bestetti et al., 2021 Pervin et al., 2025
KIT	3	3	Gorsi et al., 2022 McGlacken-Byrne et al., 2025 Patiño et al., 2017a
KITLG	1	9	Hui et al., 2006
KLK7	1	2	Alvarez-Mora et al., 2020
KMT2D	1	1	Rossetti et al., 2021
KMT5A	1	1	Rossetti et al., 2021
KNTC1	1	2	Tang and Yu, 2020
KPNA2	1	1	Rossetti et al., 2021
LAMC1	2	7	Patiño et al., 2017a Veneziano et al., 2025
LARS2	6	11	Bestetti et al., 2021 Gorsi et al., 2022 Heddar et al., 2022b McGlacken-Byrne et al., 2025 Rossetti et al., 2021 Veneziano et al., 2025
LATS1	2	2	Tang and Yu, 2020 Tsabai et al., 2025a
LEPR	2	2	Bestetti et al., 2021 Tang and Yu, 2020
LGR4	1	1	Rossetti et al., 2021
LHCGR	6	6	Fonseca et al., 2015 Gündüz et al., 2024 Heddar et al., 2022b Illés et al., 2024 Ma et al., 2025 Rossetti et al., 2021
LHX8	4	5	Bouilly et al., 2016 Eskenazi et al., 2021 Heddar et al., 2022b McGlacken-Byrne et al., 2025
LLGL1	2	2	Gorsi et al., 2022 McGlacken-Byrne et al., 2025
LMNA	5	6	Heddar et al., 2022b Ke et al., 2023 Tang and Yu, 2020 Tsabai et al., 2025a Yang et al., 2019a
LRIG2	1	1	Bestetti et al., 2019
LRP5	1	1	Rossetti et al., 2021
LRPPRC	2	2	Gorsi et al., 2022 Liu et al., 2020
MACF1	2	2	Cozette et al., 2025 Jaillard et al., 2020a
MAP2K2	1	1	Bestetti et al., 2019
MAP3K13	1	4	Hu et al., 2025a
MARF1	2	4	Gorsi et al., 2022 Yang et al., 2019a
MCM3AP	1	2	Gorsi et al., 2022
MCM8	18	35	Allen-Brady et al., 2025 Bouali et al., 2017 Desai et al., 2017 Dong et al., 2025 Dou et al., 2016 Gündüz et al., 2024 Heddar et al., 2022b Ke et al., 2023 Jiao et al., 2017 Jin et al., 2020 McGlacken-Byrne et al., 2025 Mirinezhad et al., 2024 Pervin et al., 2025 Rabello et al., 2024 Tsabai et al., 2025a Tucker et al., 2022a Wang et al., 2020 Zhang et al., 2020
MCM9	17	50	Alvarez-Mora et al., 2020 Cozette et al., 2025 Desai et al., 2017 França et al., 2020 Gorsi et al., 2022 Guo et al., 2020 Heddar et al., 2022b Jin et al., 2020 Ke et al., 2023 Liu et al., 2020 McGlacken-Byrne et al., 2025 Nauwynck et al., 2024 Patiño et al., 2017a Potorac et al., 2023 Rossetti et al., 2021 Shen et al., 2021 Yang et al., 2019a
MCMDC2	1	1	Pervin et al., 2025
MECOM	1	1	Bestetti et al., 2021
MEI1	2	2	McGlacken-Byrne et al., 2025 Patiño et al., 2017a
MEI4	1	3	Wang et al., 2025
MEIOB	5	10	Almatrafi et al., 2024 Caburet et al., 2019 Heddar et al., 2022b McGlacken-Byrne et al., 2025 Wang et al., 2022b
MEIOC	1	1	Heddar et al., 2022b
MGLL	1	1	Bestetti et al., 2019
MIOS	1	1	Gorsi et al., 2022
MIR449B	1	*	Pan et al., 2016
MLH1	3	12	Long et al., 2024 Luo et al., 2020 McGlacken-Byrne et al., 2025
MLH3	5	7	Bestetti et al., 2021 Gorsi et al., 2022 McGlacken-Byrne et al., 2025 Patiño et al., 2017a Rossetti et al., 2021
MMP2	1	*	Kim et al., 2015
MND1	2	2	Gorsi et al., 2022 Heddar et al., 2022b
MOGAT1	1	3	Tang and Yu, 2020
MORC2	1	1	Allen-Brady et al., 2025
MOV10	2	2	Bestetti et al., 2019 Bestetti et al., 2021
MRE11	1	2	Gorsi et al., 2022
MRPS22	3	6	Gorsi et al., 2022 Ke et al., 2023 Veneziano et al., 2025
MSH2	1	1	Luo et al., 2020
MSH4	10	22	Akbari et al., 2021 Hashemi Sheikhshabani et al., 2024 Heddar et al., 2022b Ke et al., 2023 Luo et al., 2023 Rossetti et al., 2021 Veneziano et al., 2025 Wyrwoll et al., 2022 Xu et al., 2025 Zeng et al., 2023
MSH5	10	18	Eskenazi et al., 2021 Hyon et al., 2016 Jiao et al., 2017 Long et al., 2024 Luo et al., 2020 Luo et al., 2023 Macaisne et al., 2022 Mandon-Pépin et al., 2008 Rouen et al., 2022 Shen et al., 2021
MSH6	5	16	Gorsi et al., 2022 Long et al., 2024 Luo et al., 2020 McGlacken-Byrne et al., 2025 Tang and Yu, 2020
MSL3	1	1	Bestetti et al., 2019
MT-ATP6	1	*	Venkatesh et al., 2010
MT-CO1	1	*	Rah et al., 2012b
MTHFR	2	1	Patiño et al., 2017a Rah et al., 2012b
MT-ND1	1	10	Kumar et al., 2010
MT-ND2	1	14	Kumar et al., 2010
MTNR1A	1	2	Morales et al., 2022
MT-TC	1	1	Ding et al., 2019
MT-TL1	1	2	Ding et al., 2019
MT-TM	1	1	Ding et al., 2019
MT-TQ	1	1	Ding et al., 2019
MT-TT	1	1	Ding et al., 2019
MUTYH	1	2	Gorsi et al., 2022
MYC	1	1	Bestetti et al., 2021
MYCN	1	1	Bestetti et al., 2019
MYRF	1	1	Tsabai et al., 2025a
NANOGNB	1	1	Gorsi et al., 2022
NANOS1	1	1	Wu et al., 2013
NANOS2	1	4	Wu et al., 2013
NANOS3	5	5	Jiao et al., 2017 Qin et al., 2007b Santos et al., 2014 Veneziano et al., 2025 Wu et al., 2013
NAP1L4	1	2	Gorsi et al., 2022
NBL1	1	1	Patiño et al., 2017a
NBN	9	12	Cozette et al., 2025 França et al., 2020 Gorsi et al., 2022 Heddar et al., 2022b Ke et al., 2023 McGlacken-Byrne et al., 2025 Rossetti et al., 2021 Tucker et al., 2018 Xu et al., 2025
NCAPG2	1	1	Gorsi et al., 2022
NCOA6	1	1	Rossetti et al., 2021
NCOR2	1	3	Rossetti et al., 2021
NFKB2	1	2	Morales et al., 2022
NHEJ1	1	2	Li et al., 2022a
NIN	1	2	Gorsi et al., 2022
NINL	1	1	Gorsi et al., 2022
NIPBL	1	3	Gorsi et al., 2022
NLRP11	3	4	Heddar et al., 2022b McGlacken-Byrne et al., 2025 Tang and Yu, 2020
NLRP5	1	1	Gorsi et al., 2022
NOBOX	24	100	Atli et al., 2025 Bestetti et al., 2021 Bouali et al., 2016 Bouilly et al., 2011 Bouilly et al., 2015 Bouilly et al., 2016 Cattoni et al., 2020 Eskenazi et al., 2021 Ferrari et al., 2016 França et al., 2020 Illés et al., 2024 Gorsi et al., 2022 Heddar et al., 2022b Jiao et al., 2017 Jordan et al., 2023 Jordan et al., 2024c Li et al., 2017 Luo et al., 2023 McGlacken-Byrne et al., 2025 Pervin et al…
NOP14	1	1	Alvarez-Mora et al., 2020
NOS3	2	3	Bestetti et al., 2021 Tang and Yu, 2020
NOTCH2	6	10	Bestetti et al., 2021 Heddar et al., 2022b Patiño et al., 2017a Rossetti et al., 2021 Tang and Yu, 2020 Veneziano et al., 2025
NOTCH3	1	1	Rossetti et al., 2021
NOTCH4	1	1	Rossetti et al., 2021
NPM2	1	1	Gorsi et al., 2022
NPPC	1	2	Park et al., 2022
NR2F2	1	1	Gorsi et al., 2022
NR5A1	24	60	Alvarez-Mora et al., 2020 Camats et al., 2012 Cattoni et al., 2020 Eskenazi et al., 2021 Fabbri et al., 2014 Gorsi et al., 2022 Heddar et al., 2022b Jaillard et al., 2020c Janse et al., 2012 Jiao et al., 2013 Jiao et al., 2017 Ke et al., 2023 Lakhal et al., 2012 Lourenço et al., 2009 Luo et al., 2023 Oral et al., 2019 Philibert et al., 2013 Portnoi et al., 2018 Rossetti et al., 2021 Rouen et al.,…
NR5A2	1	1	Bestetti et al., 2021
NRIP1	1	1	McGlacken-Byrne et al., 2025
NRP1	1	1	Bestetti et al., 2019
NTRK1	1	1	Bestetti et al., 2021
NUP107	4	8	Ke et al., 2023 Long et al., 2024 Rouen et al., 2022 Tucker et al., 2022a
NUP43	1	1	Gorsi et al., 2022
NUPR1	2	2	Gorsi et al., 2022 Veneziano et al., 2025
NXF5	1	3	França et al., 2020
ORC6	1	1	Gorsi et al., 2022
PADI6	1	1	Patiño et al., 2017a
PARD3	2	2	Bestetti et al., 2019 Bestetti et al., 2021
PATL2	1	4	McGlacken-Byrne et al., 2025
PCCA	1	1	Heddar et al., 2022b
PCCB	1	7	Heddar et al., 2022b
PCDH11X	2	20	Knauff et al., 2011 Veneziano et al., 2025
PCGF2	1	1	Gao et al., 2024
PCM1	1	2	Morales et al., 2022
PCNA	1	1	Gorsi et al., 2022
PCSK1	1	1	McGlacken-Byrne et al., 2025
PCSK5	2	2	Bestetti et al., 2019 Patiño et al., 2017a
PCSK6	1	1	Patiño et al., 2017a
PDE3A	1	1	McGlacken-Byrne et al., 2025
PDPK1	1	2	Oral et al., 2019
PGAP3	1	2	Tang and Yu, 2020
PGBD3	1	1	Rouen et al., 2022
PGRMC1	4	14	Heddar et al., 2022b Jiao et al., 2017 Luo et al., 2023 Tang and Yu, 2020
PIF1	1	1	Gorsi et al., 2022
PIWIL2	1	1	Gorsi et al., 2022
PIWIL3	2	4	Gorsi et al., 2022 Morales et al., 2022
PKP1	1	2	Rossetti et al., 2021
PLEC	2	2	McGlacken-Byrne et al., 2025 Rossetti et al., 2021
PMM2	7	15	Bestetti et al., 2021 Cozette et al., 2025 Gorsi et al., 2022 Heddar et al., 2022b Ke et al., 2023 Peng et al., 2020 Yang et al., 2019a
PNPLA7	1	1	Pervin et al., 2025
POF1B	6	10	Heddar et al., 2022b Ke et al., 2023 Oral et al., 2019 Rouen et al., 2022 Tucker et al., 2022a Veneziano et al., 2025
POLE	1	1	Rossetti et al., 2021
POLG	9	34	Bestetti et al., 2021 Cozette et al., 2025 Gorsi et al., 2022 Heddar et al., 2022b Illés et al., 2024 Ke et al., 2023 Long et al., 2024 Rossetti et al., 2021 Shen et al., 2021
POLK	1	1	Gorsi et al., 2022
POLR2C	2	3	Luo et al., 2023 McGlacken-Byrne et al., 2025
POLR3H	2	2	McGlacken-Byrne et al., 2025 Veneziano et al., 2025
POR	3	3	Bestetti et al., 2021 Ke et al., 2023 Pervin et al., 2025
POU5F1	3	5	França et al., 2020 Wang et al., 2011b Veneziano et al., 2025
PRDM1	4	4	França et al., 2020 McGlacken-Byrne et al., 2025 Patiño et al., 2017a Tang and Yu, 2020
PRDM9	5	12	Ke et al., 2023 McGlacken-Byrne et al., 2025 Pervin et al., 2025 Wang et al., 2021 Wang et al., 2025
PREPL	2	3	Jin et al., 2020 Tucker et al., 2024
PRIM1	3	3	Bestetti et al., 2021 Jiao et al., 2017 Rossetti et al., 2021
PRKD1	1	1	McGlacken-Byrne et al., 2025
PRKAA1	1	2	Bestetti et al., 2019
PRLR	2	2	Bachelot et al., 2010 Bestetti et al., 2021
PRMT6	1	1	Gorsi et al., 2022
PROK2	1	1	Er et al., 2024
PSMB1	1	1	Bestetti et al., 2019
PSMC3IP	10	15	Al-Agha et al., 2018 Er et al., 2024 Gorsi et al., 2022 Heddar et al., 2022b Ke et al., 2023 McGlacken-Byrne et al., 2025 Mei et al., 2022 Norling et al., 2014a Sirchia et al., 2022 Yang et al., 2019a
PTCH1	1	1	Patiño et al., 2017a
PTEN	2	2	Jiao et al., 2017 Shimizu et al., 2009
PTH1R	1	2	Morales et al., 2022
PTPN22	1	1	Gorsi et al., 2022
PTX3	1	1	Patiño et al., 2017a
RAD50	2	3	Gorsi et al., 2022 Rossetti et al., 2021
RAD51	3	3	Ke et al., 2023 Luo et al., 2020 Pervin et al., 2025
RAD51C	1	1	Bestetti et al., 2021
RAD51D	1	1	Allen-Brady et al., 2025
RAD52	2	12	Long et al., 2024 Rossetti et al., 2021
RAD54L	3	5	Bestetti et al., 2021 Rossetti et al., 2021 Tang and Yu, 2020
RAMAC	1	1	Chen et al., 2020b
RASAL2	1	1	Rossetti et al., 2021
RBBP8	1	2	Rossetti et al., 2021
RCBTB1	1	1	Heddar et al., 2022b
REC114	1	1	Pervin et al., 2025
REC8	7	12	Alvarez-Mora et al., 2020 Bestetti et al., 2021 Bouilly et al., 2016 Gorsi et al., 2022 McGlacken-Byrne et al., 2025 Tucker et al., 2022a Rossetti et al., 2021
RECQL4	4	16	Cozette et al., 2025 Gorsi et al., 2022 Heddar et al., 2022b Ke et al., 2023
RELN	1	2	Rossetti et al., 2021
RHOC	1	1	Bestetti et al., 2019
RICTOR	2	2	Bestetti et al., 2021 Pervin et al., 2025
RIPK1	1	1	Rossetti et al., 2021
RMI1	2	2	Luo et al., 2020 Rossetti et al., 2021
RMND1	1	1	Pervin et al., 2025
RNF168	1	1	Gorsi et al., 2022
RNF212	2	3	McGlacken-Byrne et al., 2025 Rouen et al., 2022
ROBO1	1	2	Morales et al., 2022
RPL10	1	1	Massad-Costa et al., 2007
RPL5	1	1	Gorsi et al., 2022
RREB1	1	1	Bestetti et al., 2019
RUVBL2	1	1	Gorsi et al., 2022
RXFP2	1	2	Morales et al., 2022
RYR3	3	8	Bestetti et al., 2019 Bestetti et al., 2021 Rossetti et al., 2021
SALL4	6	8	Cozette et al., 2025 Jin et al., 2020 McGlacken-Byrne et al., 2025 Shen et al., 2021 Veneziano et al., 2025 Wang et al., 2009
SAMD11	1	7	Rossetti et al., 2021
SAMHD1	1	2	Gorsi et al., 2022
SAPCD1	1	1	Patiño et al., 2017a
SDC1	1	1	Tan et al., 2023
SEMA3A	1	1	Pervin et al., 2025
SERPINE1	1	*	Jeon et al., 2014
SETX	2	6	Gorsi et al., 2022 McGlacken-Byrne et al., 2025
SF1	1	2	Veneziano et al., 2025
SGO2	1	1	Ke et al., 2023
SH2B1	1	1	Bestetti et al., 2021
SH3GL3	1	1	Bestetti et al., 2019
SIL1	1	1	Heddar et al., 2022b
SIRT6	3	3	Bestetti et al., 2019 Bestetti et al., 2021 Vanderschelden et al., 2023
SKP2	2	3	Gorsi et al., 2022 Jiao et al., 2017
SLC5A5	1	2	Bestetti et al., 2019
SLC6A9	1	2	Morales et al., 2022
SLMAP	1	1	Bestetti et al., 2019
SMARCA1	1	1	Gorsi et al., 2022
SMC1B	5	6	Bouilly et al., 2016 França et al., 2020 Gorsi et al., 2022 Luo et al., 2023 McGlacken-Byrne et al., 2025
SMYD3	1	1	Bestetti et al., 2019
SOHLH1	7	11	Bouilly et al., 2016 Gündüz et al., 2024 Jiao et al., 2017 Luo et al., 2023 Tang and Yu, 2020 Veneziano et al., 2025 Zhao et al., 2015
SOHLH2	3	17	Jiao et al., 2017 Qin et al., 2014b Veneziano et al., 2025
SOX15	1	1	Patiño et al., 2017a
SOX8	2	14	Heddar et al., 2022b Portnoi et al., 2018
SPATA22	2	3	Ke et al., 2023 Yao et al., 2022
SPIDR	9	18	Gorsi et al., 2022 Heddar et al., 2022a Heddar et al., 2022b Luo et al., 2023 Ke et al., 2023 Pervin et al., 2025 Rouen et al., 2022 Tsabai et al., 2025a Veneziano et al., 2025
STAG3	24	50	Akbari et al., 2022 Atli et al., 2025 Bestetti et al., 2021 Caburet et al., 2014 Colombo et al., 2017 Demain et al., 2021 Eskenazi et al., 2021 França et al., 2019b França et al., 2020 Gorsi et al., 2022 Gündüz et al., 2024 Heddar et al., 2022b Jaillard et al., 2020a Jaillard et al., 2020b Ke et al., 2023 McGlacken-Byrne et al., 2025 Mellone et al., 2021 Patiño et al., 2017a Rouen et al., 2022 Ro…
STAR	1	3	Ke et al., 2023
STARD9	1	1	Alvarez-Mora et al., 2020
STRA8	1	1	Tang and Yu, 2020
STS	1	1	Bestetti et al., 2019
SUN1	2	3	McGlacken-Byrne et al., 2025 Rouen et al., 2022
SYCE1	8	17	Bestetti et al., 2019 Gorsi et al., 2022 Heddar et al., 2022b Hou et al., 2022 Ke et al., 2023 Veneziano et al., 2025 Xu et al., 2025 Zhe et al., 2020
SYCP1	3	5	França et al., 2020 McGlacken-Byrne et al., 2025 Rouen et al., 2022
SYCP2L	3	4	Bakhshalizadeh et al., 2024a He et al., 2021 Ke et al., 2023
SYNE1	1	1	Rossetti et al., 2021
TACR3	1	1	Gündüz et al., 2024
TAF4	1	4	Al-Agha et al., 2018
TARBP1	1	1	Gorsi et al., 2022
TBP	2	2	Bestetti et al., 2019 Tang and Yu, 2020
TBPL2	1	1	Xu et al., 2025
TDRD9	1	1	Gorsi et al., 2022
TDRKH	1	1	Gorsi et al., 2022
TEP1	1	5	Long et al., 2024
TEX15	1	1	Rossetti et al., 2021
TG	3	3	Jin et al., 2020 Pervin et al., 2025 Pyun et al., 2011
TGFBR3	5	3	Chand et al., 2007 Dixit et al., 2006a Heddar et al., 2022b Qin et al., 2012a Qin et al., 2011
TGIF2LX	1	16	Knauff et al., 2011
THADA	1	1	Pervin et al., 2025
THBS1	3	3	Bestetti et al., 2021 Patiño et al., 2017a Tang and Yu, 2020
THBS2	1	1	Rossetti et al., 2021
TLK1	3	1	Heddar et al., 2022b Mirinezhad et al., 2024 Xu et al., 2020
TM6SF1	1	1	Chen et al., 2020b
TMEM150B	1	*	Mirinezhad et al., 2024
TNF	1	*	Kim et al., 2012
TNFRSF11A	1	1	Bestetti et al., 2019
TONSL	1	1	Gorsi et al., 2022
TOP3B	1	1	Tang and Yu, 2020
TOPAZ1	1	1	Patiño et al., 2017a
TP53	1	1	Rossetti et al., 2021
TP63	12	37	Bestetti et al., 2019 Fan et al., 2024 Heddar et al., 2022b Huang et al., 2023 Ke et al., 2023 Long et al., 2024 McGlacken-Byrne et al., 2025 Rossetti et al., 2021 Tsabai et al., 2025a Tucker et al., 2022b Vanderschelden et al., 2023 Veneziano et al., 2025
TP73	2	3	Hu et al., 2025b Rossetti et al., 2021
TPM1	1	2	Morales et al., 2022
TRIM56	1	1	Alvarez-Mora et al., 2020
TRRAP	1	1	Rossetti et al., 2021
TSC1	1	1	Patiño et al., 2017a
TSC2	3	10	McGlacken-Byrne et al., 2025 Patiño et al., 2017a Xu et al., 2022
TSG101	1	1	Gorsi et al., 2022
TSHR	1	1	Pervin et al., 2025
TSHZ2	1	2	Bestetti et al., 2019
TTI2	2	6	Heddar et al., 2022b Morales et al., 2022
TTLL1	1	1	Tšuiko et al., 2016
TUBA8	1	1	Rossetti et al., 2021
TUBB8	2	2	Cozette et al., 2025 Pervin et al., 2025
TWNK	4	10	Cozette et al., 2025 Heddar et al., 2022b Ke et al., 2023 Tucker et al., 2024
UBR2	3	4	França et al., 2020 McGlacken-Byrne et al., 2025 Patiño et al., 2017a
UBXN6	1	4	Al-Agha et al., 2018
UMODL1	1	1	Patiño et al., 2017a
USP35	1	1	Rossetti et al., 2021
USP36	1	1	Gorsi et al., 2022
USP44	1	1	Alvarez-Mora et al., 2020
USP9X	2	5	Gorsi et al., 2022 Illés et al., 2024
VCP	1	2	Gorsi et al., 2022
VCX	1	2	Tang and Yu, 2020
VDR	1	2	Morales et al., 2022
VEGFA	1	*	Jeon et al., 2011
VLDLR	2	2	Bestetti et al., 2019 Rossetti et al., 2021
VWF	2	6	Morales et al., 2022 Rossetti et al., 2021
WDR11	3	3	Er et al., 2024 Gündüz et al., 2024 Pervin et al., 2025
WDR33	1	1	Gorsi et al., 2022
WDR62	3	7	Ke et al., 2023 Zhou et al., 2018 Veneziano et al., 2025
WHAMM	3	3	Bestetti et al., 2019 Bestetti et al., 2021 Tšuiko et al., 2016
WNT4	1	1	Chen et al., 2011
WRN	3	5	Heddar et al., 2022b Ke et al., 2023 McGlacken-Byrne et al., 2025
WT1	6	10	Bestetti et al., 2021 Heddar et al., 2022b Jiao et al., 2017 Veneziano et al., 2025 Wang et al., 2015a Wang et al., 2022a
XPC	1	2	Morales et al., 2022
XPNPEP2	5	8	Bestetti et al., 2021 Eskenazi et al., 2021 França et al., 2020 Heddar et al., 2022b Illés et al., 2024
XPO1	1	1	Bestetti et al., 2019
XPO5	1	*	Rah et al., 2013a
XRCC1	1	1	McGlacken-Byrne et al., 2025
XRCC2	1	2	Ke et al., 2023
XRCC4	1	1	Heddar et al., 2022b
ZFR2	2	3	Bestetti et al., 2019 Gorsi et al., 2022
ZNF346	1	*	Mirinezhad et al., 2024
ZNF462	2	4	Bestetti et al., 2021 McGlacken-Byrne et al., 2025
ZNF572	1	1	Gorsi et al., 2022
ZP1	3	3	Gorsi et al., 2022 McGlacken-Byrne et al., 2025 Patiño et al., 2017a
ZP3	1	3	Zhou et al., 2024
ZSWIM7	3	8	Hussain et al., 2022 Lokchine et al., 2025b Yatsenko et al., 2022
*statistically signifcant genotype or allele frequency associating gene to POI

## Sheet: Supp Table S5
Supplementary Table S5. Patient details from hypothesis-free studies for moderate-evidence genes (listed in alphabetical order).
Official gene symbol	Identified in independent hypothesis-free studies	Identified in number of families from hypothesis-free studies	Identified in number of patients (including familial cases) in hypothesis-free studies	Number of variants identified	Phenotype	Allelic status	Ancestries	References for hypothesis-free studies	Confirmed by number of candidate-gene studies	Confirmed in number of unrelated families in candidate-gene studies	References for candidate-gene studies
AMHR2	2	2	2	2	SA	Monoallelic	Near Eastern (n = 1) and unspecified (n = 1)	Tucker et al., 2019 Turkyilmaz et al., 2022	6	12	Heddar et al., 2022b Li et al., 2016 Luo et al., 2023 Shen et al., 2021 Veneziano et al., 2025 Zhen and Qiao, 2014
ERCC6	2	2	3	2	PA (n = 1) and SA (n = 2)	Monoallelic	East Asian (n = 2) and Near Eastern (n = 1)	Qin et al., 2015 Turkyilmaz et al., 2022	12	30	Allen-Brady et al., 2025 Cozette et al., 2025 Gu et al., 2025 Heddar et al., 2022b Jiao et al., 2017 Jin et al., 2020 Long et al., 2024 Ke et al., 2023 Kuang et al., 2022 Luo et al., 2023 Shen et al., 2021 Tang and Yu, 2020
FANCM	2	2	4	1	PA (n = 2) and SA (n = 2)	Biallelic	European	Fouquet et al., 2017 Heddar et al., 2022b	9	21	Allen-Brady et al., 2025 Bakhshalizadeh et al., 2024a Gorsi et al., 2022 Heddar et al., 2022b Ke et al., 2023 Jaillard et al., 2020a Long et al., 2024 McGlacken-Byrne et al., 2025 Veneziano et al., 2025
FER1L6	2	2	2	2	PA (n = 1) and SA (n = 1)	Biallelic (n = 1) and monoallelic (n = 1)	Near Eastern	Turkyilmaz et al., 2022 Wood-Trageser et al., 2014	1	1	Jin et al., 2020
FSHR	5	5	9	7	PA	Biallelic	Central/South Asian (n = 2), East Asian (n = 2), European (n = 2), Latin American (n = 1), and Near Eastern (n = 2)	Bramble et al., 2016 França et al., 2017b Heddar et al., 2022b Katari et al., 2015 Yoo et al., 2023	33	87	Aittomäki et al., 1995 Achrekar et al., 2010 Beau et al., 1998 Cooper et al., 2025 Cordts et al., 2015 da Fonte Kohek et al., 1998 Doherty et al., 2002 Eskenazi et al., 2021 França et al., 2020 Gorsi et al., 2022 Gündüz et al., 2024 He et al., 2019 Heddar et al., 2022b Jaillard et al., 2020a Jiao et al., 2017 Kanaan et al., 2023 Ke et al., 2023 Liu et al., 1998 Liu et al., 2017 Liu et al., 2019 L…
IGSF10	2	4	4	4	SA (n = 1) and unspecified (n = 3)	Biallelic (n = 3) and monoallelic (n = 1)	Near Eastern (n = 3) and unspecified (n = 1)	Jolly et al., 2019 Turkyilmaz et al., 2022	2	7	Long et al., 2024 McGlacken-Byrne et al., 2025
KASH5	2	4	5	4	SA	Biallelic (n = 2) and monoallelic (n = 3)	East Asian (n = 2) and unspecified (n = 3)	Ke et al., 2023 Zhang et al., 2022a	1	1	Wu et al., 2022
LMO7	2	6	6	2	PA (n = 1) and unspecified (n = 5)	Biallelic (n = 1) and monoallelic (n = 5)	East Asian	Cai et al., 2020 Zhang et al., 2023	0	0	--
MCM8	3	5	6	4	PA (n = 2), SA (n = 1), and unspecified (n = 3)	Biallelic (n = 5) and monoallelic (n = 1)	Near Eastern (n = 5) and unspecified (n = 1)	Heddar et al., 2022b Jolly et al., 2019 Mishra et al., 2024	18	35	Allen-Brady et al., 2025 Bouali et al., 2017 Desai et al., 2017 Dong et al., 2025 Dou et al., 2016 Gündüz et al., 2024 Heddar et al., 2022b Ke et al., 2023 Jiao et al., 2017 Jin et al., 2020 McGlacken-Byrne et al., 2025 Mirinezhad et al., 2024 Pervin et al., 2025 Rabello et al., 2024 Tsabai et al., 2025a Tucker et al., 2022a Wang et al., 2020 Zhang et al., 2020
MCM9	6	9	11	7	PA (n = 8) and unspecified (n = 3)	Biallelic (n = 8), monoallelic (n = 1), and unspecified (n = 1)	European (n = 1), Near Eastern (n = 8), and unspecified (n = 2)	Ding et al., 2024a Fauchereau et al., 2016 Goldberg et al., 2015 Jolly et al., 2019 Tucker et al., 2019 Wood-Trageser et al., 2014	17	50	Alvarez-Mora et al., 2020 Cozette et al., 2025 Desai et al., 2017 França et al., 2020 Gorsi et al., 2022 Guo et al., 2020 Heddar et al., 2022b Jin et al., 2020 Ke et al., 2023 Liu et al., 2020 McGlacken-Byrne et al., 2025 Nauwynck et al., 2024 Patiño et al., 2017a Potorac et al., 2023 Rossetti et al., 2021 Shen et al., 2021 Yang et al., 2019a
MGA	2	39	39	38	PA (n = 6), SA (n = 32), and unspecified (n = 1)	Biallelic (n = 1) and monoallelic (n = 38)	East Asian (n = 38) and Near Eastern (n = 1)	Kline et al., 2025 Tang et al., 2024	0	0	--
MRPS22	2	3	4	2	PA (n = 3) and unspecified (n = 1)	Biallelic	Near Eastern	Chen et al., 2018a Jolly et al., 2019	3	6	Gorsi et al., 2022 Ke et al., 2023 Veneziano et al., 2025
MSH4	2	2	4	2	PA (n = 2) and SA (n = 2)	Biallelic	Latin American (n = 2) and Near Eastern (n = 2)	Carlosama et al., 2017 Turkyilmaz et al., 2022	10	22	Akbari et al., 2021 Hashemi Sheikhshabani et al., 2024 Heddar et al., 2022b Ke et al., 2023 Luo et al., 2023 Rossetti et al., 2021 Veneziano et al., 2025 Wyrwoll et al., 2022 Xu et al., 2025 Zeng et al., 2023
MSH5	2	2	3	2	SA	Biallelic (n = 2) and monoallelic (n = 1)	East Asian (n = 2) and Near Eastern (n = 1)	Guo et al., 2017 Turkyilmaz et al., 2022	10	18	Eskenazi et al., 2021 Hyon et al., 2016 Jiao et al., 2017 Long et al., 2024 Luo et al., 2020 Luo et al., 2023 Macaisne et al., 2022 Mandon-Pépin et al., 2008 Rouen et al., 2022 Shen et al., 2021
NOBOX	3	3	4	4	PA (n = 3) and unspecified (n = 1)	Biallelic	European (n = 1), Latin American (n = 2), and Near Eastern (n = 1)	França et al., 2017a Jolly et al., 2019 Sassi et al., 2021	24	100	Atli et al., 2025 Bestetti et al., 2021 Bouali et al., 2016 Bouilly et al., 2011 Bouilly et al., 2015 Bouilly et al., 2016 Cattoni et al., 2020 Eskenazi et al., 2021 Ferrari et al., 2016 França et al., 2020 Illés et al., 2024 Gorsi et al., 2022 Heddar et al., 2022b Jiao et al., 2017 Jordan et al., 2023 Jordan et al., 2024c Li et al., 2017 Luo et al., 2023 McGlacken-Byrne et al., 2025 Pervin et al…
NUP107	2	2	3	2	PA (n = 2) and unspecified (n = 1)	Biallelic (n = 2) and monoallelic (n = 1)	Latin American (n = 2) and unspecified (n = 1)	Ren et al., 2018 Tucker et al., 2019	4	8	Ke et al., 2023 Long et al., 2024 Rouen et al., 2022 Tucker et al., 2022a
PSMC3IP	2	2	2	2	PA (n = 1) and unspecified (n = 1)	Biallelic	Near Eastern (n = 1) and unspecified (n = 1)	Ding et al., 2024a Jolly et al., 2019	10	15	Al-Agha et al., 2018 Er et al., 2024 Gorsi et al., 2022 Heddar et al., 2022b Ke et al., 2023 McGlacken-Byrne et al., 2025 Mei et al., 2022 Norling et al., 2014a Sirchia et al., 2022 Yang et al., 2019a
RAD51B	2	2	3	2	PA (n = 2) and SA (n = 1)	Biallelic	Latin American (n = 2) and Near Eastern (n = 1)	Franca et al., 2022 Kline et al., 2025	0	0	--
SALL4	2	4	4	4	SA	Monoallelic	East Asian (n = 3) and Near Eastern (n = 1)	Turkyilmaz et al., 2022 Wang et al., 2019	6	8	Cozette et al., 2025 Jin et al., 2020 McGlacken-Byrne et al., 2025 Shen et al., 2021 Veneziano et al., 2025 Wang et al., 2009
SOHLH1	2	2	4	2	PA	Biallelic	Near Eastern (n = 2) and unspecified (n = 2)	Bayram et al., 2015 Jolly et al., 2019	7	11	Bouilly et al., 2016 Gündüz et al., 2024 Jiao et al., 2017 Luo et al., 2023 Tang and Yu, 2020 Veneziano et al., 2025 Zhao et al., 2015
SPIDR	2	2	5	2	PA (n = 2) and SA (n = 3)	Biallelic (n = 2) and monoallelic (n = 3)	Near Eastern	Sakka et al., 2022 Smirin-Yosef et al., 2017	9	18	Gorsi et al., 2022 Heddar et al., 2022a Heddar et al., 2022b Luo et al., 2023 Ke et al., 2023 Pervin et al., 2025 Rouen et al., 2022 Tsabai et al., 2025a Veneziano et al., 2025
STAG3	4	4	8	4	PA	Biallelic	East Asian (n = 2), European (n = 4), and Near Eastern (n = 2)	He et al., 2018a Heddar et al., 2022b Heddar et al., 2019 Le Quesne Stabej et al., 2016	24	50	Akbari et al., 2022 Atli et al., 2025 Bestetti et al., 2021 Caburet et al., 2014 Colombo et al., 2017 Demain et al., 2021 Eskenazi et al., 2021 França et al., 2019b França et al., 2020 Gorsi et al., 2022 Gündüz et al., 2024 Heddar et al., 2022b Jaillard et al., 2020a Jaillard et al., 2020b Ke et al., 2023 McGlacken-Byrne et al., 2025 Mellone et al., 2021 Patiño et al., 2017a Rouen et al., 2022 Ro…
TP63	2	3	3	3	PA	Monoallelic	Unspecified	Ding et al., 2024a Tucker et al., 2019	12	37	Bestetti et al., 2019 Fan et al., 2024 Heddar et al., 2022b Huang et al., 2023 Ke et al., 2023 Long et al., 2024 McGlacken-Byrne et al., 2025 Rossetti et al., 2021 Tsabai et al., 2025a Tucker et al., 2022b Vanderschelden et al., 2023 Veneziano et al., 2025
TRIM4	2	2	4	2	PA	Biallelic	East Asian	He et al., 2018a Yuan et al., 2019	0	0	--
ZSWIM7	2	2	3	3	PA	Biallelic	Near Eastern (n = 2) and unspecified (n = 1)	Christofolini et al., 2025 McGlacken-Byrne et al., 2022b	3	8	Hussain et al., 2022 Lokchine et al., 2025b Yatsenko et al., 2022

## Sheet: Supp Table S6
Supplementary Table S6. Longform alignment of publicly available POI candidate gene lists (with moderate-evidence genes from this review shown in bold).
PanelApp Australia (v. 0.389)	PanelApp Genomics England (v. 1.71)	Ruth et al., 2021	Shekari et al., 2023	POI candidate genes shared between lists
AARS2	BMP15	AARS2	AIRE	BMP15
AIRE	C14orf39	AIRE	ALOX12B	BMPR1B
ANKRD31	CLPP	ALOX12B	AMH	CLPP
ANOS1	CYP17A1	AMH	ANKRD31	DACH2
BLM	CYP19A1	AR	AR	DIAPH2
BMP15	EIF2B5	ATG7	ATG7	EIF4ENIF1
BNC1	FANCM	ATG9A	ATG9A	FANCA
BRCA2	FOXL2	ATM	ATM	FANCM
C14orf39	FSHB	BMP15	BLM	FIGLA
HROB	FSHR	BMPR1B	BMP15	FMR1
KASH5	GALT	BNC1	BMPR1A	FOXL2
CLPB	GGPS1	BRCA2	BMPR1B	FSHR
CLPP	HARS2	CDKN1B	BNC1	GDF9
CYP17A1	HFM1	CLPP	BRCA2	HARS2
CYP19A1	HSD17B4	CPEB1	BUB1B	HFM1
DAP3	LARS2	CSB-PGBD3	C14orf39	HSD17B4
DCAF17	MCM8	DACH2	CDKN1B	KHDRBS1
DMC1	MCM9	DIAPH2	CLPP	LARS2
EIF2B2	MSH4	DMC1	CPEB1	MCM8
EIF2B4	NOBOX	EIF4ENIF1	CYP17A1	MCM9
EIF2B5	NR5A1	ESR1	CYP19A1	MSH4
EIF4ENIF1	PMM2	FANCA	DACH2	MSH5
ESR1	POLG	FANCL	DIAPH2	NANOS3
EXO1	SOHLH1	FANCM	DMC1	NOBOX
FANCM	STAG3	FIGLA	EIF2B2	NR5A1
FGF8	SYCE1	FMR1	EIF2B4	NUP107
FGFR1	TWNK	FOXL2	EIF2B5	PGRMC1
FIGLA	AARS2	FSHR	EIF4ENIF1	PMM2
FMR1	BMPR1B	GDF9	ERAL1	POF1B
FOXL2	BUB1B	HARS2	ERCC6	POLG
FSHB	DACH2	HFM1	FANCA	POLR2C
FSHR	EIF2B4	HSD17B4	FANCC	POLR3H
GALT	EIF4ENIF1	IGSF10	FANCG	PSMC3IP
GDF9	FIGLA	INHA	FANCL	SGO2
GGPS1	GDF9	KHDRBS1	FANCM	SOHLH2
GNAS	KHDRBS1	LARS2	FIGLA	STAG3
GNRH1	LMNA	LHCGR	FMN2	SYCE1
GNRHR	MSH5	LHX8	FMR1	TWNK
HARS2	NANOS3	LRPPRC	FOXL2
HFM1	NOG	MCM8	FOXO4
HSD17B4	NUP107	MCM9	FSHB
HSF2BP	PGRMC1	MEIOB	FSHR
KHDRBS1	POF1B	MND1	GALT
KISS1R	POLR2C	MRPS22	GDF9
LARS2	POLR3H	MSH4	GGPS1
LHB	POU5F1	MSH5	HARS2
LHCGR	PSMC3IP	NANOS3	HFM1
LHX8	RCBTB1	NOBOX	HROB
MCM8	SGO2	NOTCH2	HSD17B4
MCM9	SOHLH2	NR5A1	HSF2BP
MRPL49	SYCP2L	NUP107	IGSF10
MRPS22	ATM	PGRMC1	KASH5
MSH4	BLM	PMM2	KHDRBS1
NBN	DIAPH2	POF1B	LARS2
NCOA7	EIF2B2	POLG	LHCGR
NOBOX	ERAL1	POLR2C	LHX8
NOTCH2	FANCA	POLR3H	LMNA
NR5A1	FANCC	PSMC3IP	LRPPRC
NUP107	FANCG	PTHB1	MCM8
PMM2	FMR1	SALL4	MCM9
POLG	FOXO4	SF1	MEIOB
POLR3A	HSF2BP	SGOL2	MRPS22
POLR3B	NBN	SMC1β	MSH4
POR	RECQL4	SOHLH2	MSH5
PRDM9	WRN	SPIDR	NANOS3
PREPL	YTHDC2	STAG3	NBN
PROK2	ZSWIM7	SYCE1	NHEJ1
PROKR2		TGFBR3	NOBOX
PSMC3IP		TP63	NOG
RECQL4		TRIM37	NOTCH2
RNF216		TWNK	NR5A1
SEMA3A		WDR62	NUP107
SOHLH1		WT1	PGRMC1
SPDYC		WWTR1	PMM2
STAG3			POF1B
STAR			POLG
SYCE1			POLR2C
SYCP2L			POLR3B
TAC3			POLR3H
TACR3			POU5F1
TFAM			PRDM9
TP63			PSMC3IP
TWNK			RAD51
WDR11			RCBTB1
WRN			REC8
WT1			RECQL4
YTHDC2			SALL4
ZSWIM7			SGO2
AMH			SMC1B
AMHR2			SOHLH1
ATG7			SOHLH2
BMPR1A			SPATA22
BMPR1B			SPIDR
BUB1B			STAG3
CCDC141			SYCE1
CHD7			SYCP2L
CPEB1			TP63
DAZL			TRIM37
ERAL1			TWNK
ERCC6			WDR62
ESR2			WRN
FANCA			WT1
FANCC			YTHDC2
FANCI			ZSWIM7
FANCL
FEZF1
FGF17
GATA4
HELQ
IGSF10
INSL3
KISS1
LMNA
MEIOB
MGA
MRPL50
MRPS7
MSH5
NANOS3
PEX6
POF1B
POLR2C
POLR3H
REC8
SPATA22
SPIDR
WDR62
ZNF483
ANTXR1
ATG9A
AXL
BMP8B
BMPR2
BTG4
DACH2
DIAPH2
DUSP6
FLRT3
GJA4
HNF1B
HS6ST1
IL17RD
NOG
PANX1
PATL2
PGRMC1
POU5F1
PRDM1
SGO2
RCBTB1
SOHLH2
SWSAP1
TUBB8
TUFM
UBR2
WEE2
XRCC2
XRCC4
ZP1
ZP2
ZP3

## Sheet: Supp Table S7
Supplementary Table S7. Overview of limited-evidence genes from hypothesis-free studies, along with confirmational candidate-gene studies (listed in alphabetical order).
Official gene symbol	Identified in number of independent hypothesis-free studies	Identified in number of unrelated families in hypothesis- free studies	Confirmed by number of candidate-gene studies	Confirmed in number of unrelated families in candidate- gene studies	Identified by number of total analyses (hypothesis-free plus candidate-gene)	Identified in total unrelated families (hypothesis-free plus candidate- gene studies)	References for hypothesis-free studies	References for candidate-gene studies
ALOX12	1	3	1	1	2	4	Ke et al., 2023	Ke et al., 2023
ANKRD36C	1	4	0	0	1	4	Ke et al., 2023	--
BMP6	1	2	1	1	2	3	Ke et al., 2023	Bestetti et al., 2021
CKAP5	1	2	1	5	2	7	Hu et al., 2025a	Hu et al., 2025a
CNN2	2	7	0	0	2	7	Cai et al., 2020 Zhang et al., 2022b	--
CPEB1	1	2	6	9	7	11	Ke et al., 2023	Bestetti et al., 2019 França et al., 2020 Jiao et al., 2020 Rouen et al., 2022 Tsabai et al., 2025a Tšuiko et al., 2016
DKKL1	1	7	0	0	1	7	Cai et al., 2020	--
DST	2	2	1	1	3	3	Pan et al., 2025b Xu et al., 2023	McGlacken-Byrne et al., 2025
ESRRG	1	2	0	0	1	2	Tucker et al., 2019	--
FRG1	1	7	0	0	1	7	Cai et al., 2020	--
GPSM1	1	3	0	0	1	3	Cai et al., 2020	--
H1-8	1	2	0	0	1	2	Ke et al., 2023	--
HMMR	1	4	0	0	1	4	Ke et al., 2023	--
HSD17B1	1	5	0	0	1	5	Ke et al., 2023	--
LGR4	1	3	1	1	2	4	Ke et al., 2023	Rossetti et al., 2021
LSP1	2	2	0	0	2	2	Li et al., 2020b Wang et al., 2017	--
MCMDC2	1	3	1	1	2	4	Ke et al., 2023	Pervin et al., 2025
MEIOSIN	1	2	0	0	1	2	Ke et al., 2023	--
MST1R	1	4	0	0	1	4	Ke et al., 2023	--
NUP43	1	3	1	1	2	4	Ke et al., 2023	Gorsi et al., 2022
OR2T29	1	5	0	0	1	5	Cai et al., 2020	--
PABPC3	1	6	0	0	1	6	Cai et al., 2020	--
POLR3H	1	2	2	2	3	4	França et al., 2019a	McGlacken-Byrne et al., 2025 Veneziano et al., 2025
PPM1B	1	2	0	0	1	2	Ke et al., 2023	--
PRDM1	1	3	4	4	5	7	Ke et al., 2023	França et al., 2020 McGlacken-Byrne et al., 2025 Patiño et al., 2017a Tang and Yu, 2020
PSPH	2	10	0	0	2	10	Cai et al., 2020 Zhang et al., 2022b	--
RALGPS1	2	2	0	0	2	2	Pan et al., 2025b Yuan et al., 2019	--
RFWD3	1	2	0	0	1	2	Ke et al., 2023	--
SCUBE1	1	3	0	0	1	3	Cai et al., 2020	--
SHOC1	1	6	0	0	1	6	Ke et al., 2023	--
SLX4	1	3	0	0	1	3	Ke et al., 2023	--
TAS1R1	2	2	0	0	2	2	Li et al., 2020b Zhang et al., 2022b	--
TBC1D26	1	4	0	0	1	4	Cai et al., 2020	--
TPSAB1	1	8	0	0	1	8	Cai et al., 2020	--
USP53	1	2	0	0	1	2	Tucker et al., 2019	--
YTHDC2	1	2	0	0	1	2	McGlacken-Byrne et al., 2022a	--
ZAR1	1	6	0	0	1	6	Ke et al., 2023	--
ZP3	1	3	1	3	2	6	Ke et al., 2023	Zhou et al., 2024

## Sheet: Supp Table S8
Supplementary Table S8. Phenotype and zygosity distribution for limited-evidence genes.
		Primary amenorrhea		Secondary amenorrhea		Unspecified phenotype
Official gene symbol	Total patients identified in hypothesis-free studies	Biallelic	Monoallelic	Biallelic	Monoallelic	Biallelic	Monoallelic
ALOX12	3	0	1 (33.3%)	0	2 (66.7%)	0	0
ANKRD36C	4	0	0	0	0	0	4 (100%)
BMP6	2	0	0	0	2 (100%)	0	0
CKAP5	4	0	0	0	4 (100%)	0	0
CNN2	32	0	0	2 (6.2%)	0	0	30 (93.8%)
CPEB1	2	0	0	0	2 (100%)	0	0
DKKL1	5	0	0	0	0	0	5 (100%)
DST	4	0	0	0	4 (100%)	0	0
ESRRG	2	0	1 (50.0%)	0	1 (50.0%)	0	0
FRG1	5	0	0	0	0	0	5 (100%)
GPSM1	3	0	0	0	0	0	3 (100%)
H1-8	2	0	0	0	2 (100%)	0	0
HMMR	4	0	1 (25.0%)	0	3 (75.0%)	0	0
HSD17B1	5	0	0	0	5 (100%)	0	0
LGR4	3	0	0	0	3 (100%)	0	0
LSP1	4	0	0	0	4 (100%)	0	0
MCMDC2	2	0	0	1 (50.0%)	1 (50.0%)	0	0
MEIOSIN	2	0	0	0	2 (100%)	0	0
MST1R	4	0	1 (25.0%)	0	3 (75.0%)	0	0
NUP43	3	0	0	0	3 (100%)	0	0
OR2T29	5	0	0	0	0	0	5 (100%)
PABPC3	52	0	0	0	0	0	52 (100%)
POLR3H	4	4 (100%)	0	0	0	0	0
PPM1B	2	0	1 (50.0%)	0	1 (50.0%)	0	0
PRDM1	3	0	0	0	3 (100%)	0	0
PSPH	11	0	0	0	2 (18.2%)	0	9 (81.8%)
RALGPS1	4	2 (50.0%)	0	0	2 (50.0%)	0	0
RFWD3	2	0	0	0	2 (100%)	0	0
SCUBE1	3	0	0	0	0	0	3 (100%)
SHOC1	6	0	0	0	6 (100%)	0	0
SLX4	3	0	0	0	3 (100%)	0	0
TAS1R1	4	0	0	0	4 (100%)	0	0
TBC1D26	4	0	0	0	0	0	4 (100%)
TPSAB1	8	0	0	0	0	0	8 (100%)
USP53	2	1 (50.0%)	0	1 (50.0%)	0	0	0
YTHDC2	3	3 (100%)	0	0	0	0	0
ZAR1	6	0	0	1 (16.7%)	5 (83.3%)	0	0
ZP3	3	0	0	1 (33.3%)	2 (66.7%)	0	0

## Sheet: Supp Table S9
Supplementary Table S9. Full list of chromosome regions identified in hypothesis-free studies (overlapping regions presented in bold typeface).
Chr.	Classification	Cytoband	Identified locus (GRCh38 assembly)	Associated genes (if specified in original publication)	Number of patients with association	Ancestry	Phenotype	Reference
1	Gain	1p12	chr1:119,308,513-119,622,789	HAO2, HSD3B2, HSD3B1	2	Unspecified	Unspecified	McGuire et al., 2011
1	Gain	1p12	chr1:119,374,950-119,609,459	HAO2, HSD3B2, HSD3B1	2	Unspecified	Unspecified	McGuire et al., 2011
1	Loss	1p31.3	chr1:61,742,480-62,163,915a	PATJ	1	European	SA	Tšuiko et al., 2016
1	Gain	1p32.1	chr1:59,295,910-60,097,976a	FGGY, HOOK1, CYP2J2, C1orf87, PGBD4P8	1	European	SA	Tšuiko et al., 2016
1	Loss	1p33	chr1:48,532,854-48,776,969a	AGBL4, BEND5	1	European	SA	Tšuiko et al., 2016
1	Gain	1p34.3	chr1:35,032,172-35,193,446a	ZMYM1, SFPQ	1	European	SA	Tšuiko et al., 2016
1	Gain	1q25.1	chr1:173,714,919-173,858,808a	KLHL20, CENPL, DARS2	1	European	SA	Tšuiko et al., 2016
1	Gain	1q25.1	chr1:173,931,084-174,022,357a	RC3H1	1	European	SA	Tšuiko et al., 2016
1	Gain	1q43	chr1:239,192,855-239,372,213	--	1	Unspecified	Unspecified	McGuire et al., 2011
1	Loss	1q43	chr1:240,014,348-240,475,187a	FMN2	1	European	SA	Tšuiko et al., 2016
2	Loss	2p11.2	chr2:84,459,572-84,819,589a	DNAH6	1	Unspecified	SA	Norling et al., 2014b
2	Loss	2p13.1	chr2:73,385,758-73,643,229a	ALMS1, NAT8	1	European	SA	Tšuiko et al., 2016
2	Loss	2p16.2	chr2:53,971,113-54,256,229a	ACYP2, TSPYL6	1	Unspecified	PA	Norling et al., 2014b
2	Gain	2p16.3	chr2:51,455,776-51,785,140	--	1	Unspecified	PA	McGuire et al., 2011
2	Gain	2q11.1	chr2:94,791,103-95,386,081a	ANKRD20A8P, TEKT4, MAL, MRPS5, ZNF514, ZNF2, PROM2, KCNIP3	1	European	SA	Tšuiko et al., 2016
2	Gain	2q21.2	chr2:132,671,788-133,568,463a	NCKAP5	1	European	SA	Tšuiko et al., 2016
2	Gain	2q33.1	chr2:199,269,484-201,071,671a	SATB2, FTCDNL1, C2orf69, TYW5, C2orf47, SPATS2L, KCTD18, SGO2, AOX1, AOX2P, BZW1, CLK1, PPIL3, NIF3L1, ORC2, HYCC2	1	European	SA	Tšuiko et al., 2016
2	Loss	2q34	chr2:210,021,421-210,172,760a	KANSL1L	1	Unspecified	SA	Norling et al., 2014b
2	Gain	2q35	chr2:215,942,584-216,372,483a	MREG, PECR, TMEM169, XRCC5, LINC01963, MARCHF4	1	European	SA	Tšuiko et al., 2016
3	Gain	3p21.31	chr3:47,585,269-47,580,240a	SMARCC1, CSPG5	1	Unspecified	PA	Norling et al., 2014b
3	Gain	3p26.1	chr3:7,963,141-8,110,628	--	1	Unspecified	PA	McGuire et al., 2011
3	Gain	3p26.3	chr3:196,763-3,057,959a	CHL1, CNTN6, CNTN4	1	European	SA	Tšuiko et al., 2016
3	Gain	3q21.1	chr3:123,201,859-123,449,090a	SEC22A, ADCY5	1	European	SA	Tšuiko et al., 2016
3	Gain	3q27.1	chr3:183,178,041-183,298,504a	Microduplication including MCF2L2, B3GNT5	1	European	SA	Tšuiko et al., 2016
4	Gain	4p16.1	chr4:10,439,873-10,684,768a	Microduplication including ZNF518B, CLNK	1	European	SA	Tšuiko et al., 2016
4	Gain	4p16.1	chr4:5,951,102-6,194,685	Including CRMP1, C4orf50, JAKMIP1	1	Unspecified	Unspecified	McGuire et al., 2011
4	Gain	4p16.2	chr4:4,652,630-4,887,263	Including MSX1	1	Unspecified	Unspecified	McGuire et al., 2011
4	Gain	4q12	chr4:56,907,876-56,966,808a	Microduplication including REST	1	European	SA	Tšuiko et al., 2016
4	Gain	4q21.21	chr4:79,225,694-79,408,228a	Microduplication including NAA11, GK2	1	European	SA	Tšuiko et al., 2016
4	Loss	4q34.2	chr4:176,065,840-176,195,585a	Microdeletion including WDR17, SPATA4	1	European	SA	Tšuiko et al., 2016
5	Gain	5p13.2	chr5:33,986,165-34,832,612a	Microduplication including AMACR, C1QTNF3, RAI14	1	European	SA	Tšuiko et al., 2016
5	Gain	5p15.31	chr5:9,035,033-9,712,378a	Microduplication including SEMA5A, TAS2R1	1	European	SA	Tšuiko et al., 2016
5	Frequency	5q14.1 – 5q15	chr5:80,626,226-93,594,611a	Linkage block of 70 genes including DHFR, NR2F1, CCNH, SSBP2, VCAN	10	European	SA	Oldenburg et al., 2008
5	Frequency	5q31	chr5:131,949,973-132,012,213a	ACSL6	--c	East Asian	Unspecified	Kang et al., 2009
5	Gain	5q31.1	chr5:132,861,185-132,866,651a	GDF9	1	Unspecified	SA	Norling et al., 2014b
6	Gain	6p11.2	chr6:57,404,409-60,427,425	PRIM2	1	Unspecified	Unspecified	McGuire et al., 2011
6	Loss	6q13	chr6:72,621,792-73,225,770a	KCNQ5, KHDC1L	1	European	SA	Tšuiko et al., 2016
6	Frequency	6q14.1	chr6:80,106,610-80,466,676a	BCKDHB	--c	Unspecified	Unspecified	Kang et al., 2008a
6	Loss	6q26	chr6:161,559,348-161,896,740	PARKN	1	Near Eastern	SA	Turkyilmaz et al., 2022
6	Gain	6q27	chr6:170,290,703-170,584,692a	FAM120B, PSMB1, TBP, PDCD2	1	European	SA	Tšuiko et al., 2016
7	Gain	7p14.1	chr7:37,683,721-37,833,788a	GPR141	1	European	SA	Tšuiko et al., 2016
7	Loss	7p14.3	chr7:33,109,557-33,877,180a	BBS9	1	European	SA	Tšuiko et al., 2016
7	Frequency	7p14.3	chr7:33,129,285-33,635,767a	BBS9	--c	East Asian	Unspecified	Kang et al., 2008b
7	Gain	7p15.3	chr7:21,428,043-21,901,839a	SP4, DNAH11	1	European	SA	Tšuiko et al., 2016
7	Frequency	7p21.1 - 7p15.3	chr7:17,683,648-20,239,019	11 genes and 5 pseudogenes	4	Near Eastern	PA	Caburet et al., 2012
7	Loss	7p22.3	chr7:2,251,770-2,354,318a	SNX8	1	European	SA	Tšuiko et al., 2016
7	Gain	7q11.22	chr7:71,154,112-71,489,246	WBSCR17, CALN1	1	Unspecified	SA	McGuire et al., 2011
7	Gain	7q11.23 - 7q21.11	chr7:76,516,953-79,927,731	PMS2L11, CCDC146, FL2, PION, PTPN12, RSBN1L, TMEM60, PHTF2, MAGI2, RPL13AP17	1	Unspecified	Unspecified	McGuire et al., 2011
7	Gain	7q21.3	chr7:97,784,798-97,925,967	ASNS	1	Unspecified	Unspecified	McGuire et al., 2011
7	Frequency	7q21.3 - 7q22.2	chr7:95,985,884-105,934,756	166 genes and 39 pseudogenes	4	Near Eastern	PA	Caburet et al., 2012
7	Gain	7q34	chr7:140,293,693-140,427,974a	SLC37A3, RAB19	1	European	SA	Tšuiko et al., 2016
8	Loss	8p23.1	chr8:8,317,736-12,625,014a	PRAG1 through FAM66A	1	European	SA	Tšuiko et al., 2016
8	Gain	8p23.2	chr8:2,597,887-3,281,640	CSMD1	1	Unspecified	Unspecified	McGuire et al., 2011
8	Gain	8p23.3	chr8:569,919-895,807	ERICH1	1	Unspecified	Unspecified	McGuire et al., 2011
8	Gain	8q11.1	chr8:46,595,713-47,012,322	BEYLA	1	Unspecified	Unspecified	McGuire et al., 2011
8	Gain	8q22.3	chr8:103,500,610-104,254,430a	RIMS2	1	European	SA	Tšuiko et al., 2016
8	Loss	8q23.3	chr8:112,222,928-113,436,939a	CSMD3	1	European	SA	Tšuiko et al., 2016
8	Loss	8q24.13	chr8:123,883,569-124,020,492	FER1L6	1	Unspecified	SA	McGuire et al., 2011
9	Gain	9q21.11 - 9q21.12	chr9:69,814,834-70,678,583	C9orf135, MAMDC2, SMC5, KLF9, TRPM3	1	Unspecified	PA	McGuire et al., 2011
9	Loss	9q22.31	chr9:92,297,358-92,424,471a	NOL8, CENPP, OGN, OMD	1	European	SA	Tšuiko et al., 2016
9	Loss	9q31.3	chr9:111,525,054-111,599,893a	ZNF483, PTGR1	1	European	SA	Tšuiko et al., 2016
9	Loss	9q33.1	chr9:116,423,112-116,701,300a	ASTN2, TRIM32	1	European	SA	Tšuiko et al., 2016
9	Loss	9q33.3 - 9q33.5	chr9:124,488,834-124,725,077	NR5A1 (partial), NR6A1 (partial), MIR181A2H, MIR181A2, MIR181B2	1	European	SA	Harrison et al., 2013
10	Loss	10p15.1	chr10:4,835,330-5,164,133	AKR1E2, AKR1C1, AKR1C2, AKR1C3, AKR1CL1	1	Unspecified	SA	McGuire et al., 2011
10	Loss	10q23.31	chr10:88,767,812-88,898,851	LIPN, LIPM, ANKRD22, STAMBPL1	1	Unspecified	SA	McGuire et al., 2011
10	Loss	10q26.3	chr10:133,520,406-133,569,835a	CYP2E1, SYCE1	2	European	SA	Tšuiko et al., 2016
10	Loss	10q26.3	chr10:133,428,733-133,592,533	CYP2E1, SYCE1	1	Unspecified	SA	McGuire et al., 2011
11	Gain	11p11.2 - 11p11.12	chr11:48,577,939-50,821,348	FOLH1, OR4C13, OR4C12, OR4A5, OR4C46	1	Unspecified	Unspecified	McGuire et al., 2011
12	Gain	12p13.33	chr12:1,970,780-2,697,950a	CACNA1C	1	Unspecified	PA	Norling et al., 2014b
12	Gain	12q23.3	chr12:104,455,295-104,762,014a	CHST11	1	European	SA	Tšuiko et al., 2016
12	Gain	12q24.31	chr12:124,776,856-124,882,668a	SCARB1	1	European	SA	Tšuiko et al., 2016
13	Frequency	13q14.12	chr13:44,087,185-44,224,061	1 (hypothetical) gene	4	Near Eastern	PA	Caburet et al., 2012
13	Frequency	13q14.3	chr13:50,529,325-50,686,887	1 full gene and 2 terminal exons	4	Near Eastern	PA	Caburet et al., 2012
14	Loss	14q21.1	chr14:40,521,213-40,766,206	--	1	Unspecified	SA	McGuire et al., 2011
15	Loss	15q21.3	chr15:57,375,967-57,550,729a	CGNL1	1	European	SA	Tšuiko et al., 2016
15	Gain	15q25.2	chr15:82,130,233-82,349,475a	ELF1, SAXO2, GOLGA6L10	1	European	SA	Tšuiko et al., 2016
15	Loss	15q25.1 - 15q25.2	chr15:82,506,534-84,181,097	CPEB1, AP3B2, FSD2, HOMER2, WHAMM, FAM103A1, C15orf40, BTBD1, TM6SF1, HDGFRP3, BNC1, SH3GL3, ADAMTSL	1	Unspecified	PA	McGuire et al., 2011
15	Loss	15q25.2	chr15:82,543,201-84,126,601a	CPEB1, AP3B2, FSD2, WHAMM, HOMER2, FAM103A1, C15orf40, BTBD1, TM6SF1, HDGFRP3, BNC1, SH3GL3, ADAMTSL3, EFL1P1	1	European	SA	Tšuiko et al., 2016
15	Loss	15q25.2	chr15:82,571,489-84,546,807	CPEB1	1	Unspecified	PA	Cozette et al., 2025
15	Loss	15q25.2	chr15:82,912,821-83,366,605	--	1	East Asian	PA	Yuan et al., 2022
15	Gain	15q25.2	chr15:83,447,341-83,633,820a	SH3GL3	1	Unspecified	PA	Norling et al., 2014b
15	Gain	15q26.1	chr15:91,978,624-92,266,791	SLCO3A1	1	Unspecified	SA	Cozette et al., 2025
15	Loss	15q26.2	chr15:94,231,366-94,483,952a	MCTP2	2	Unspecified	PA	Norling et al., 2014b
16	Loss	16p11.2	chr16:28,813,472-28,976,477	12 genes (none previously associated with POI)	1	East Asian	PA	Yuan et al., 2022
16	Gain	16p11.2	chr16:29,777,882-29,973,052a	ZG16, KIF22, MAZ, PRRT2, PAGR1, MVP, CDIPT, SEZ6L2, ASPHD1, KCTD13, TMEM219	1	European	SA	Tšuiko et al., 2016
16	Gain	16p13.11	chr16:14,982,621-16,365,905	PCXDC1, NTAN1, RRN3, MPV17L, C16orf45, NDE1, MIR484, MYH11, C16orf63, ABCC1, ABCC6, NOMO3	1	Unspecified	Unspecified	McGuire et al., 2011
16	Gain	16p13.12	chr16:13,920,138-13,952,348a	ERCC4	1	European	SA	Tšuiko et al., 2016
17	Loss	17p12	chr17:14,069,490-15,475,733a	COX10, CDRT15, HS3ST3B1, PMP22, TEKT3, CDRT4	1	European	SA	Tšuiko et al., 2016
17	Loss	17p13.3	chr17:142,789-386,376a	DOC2B, RPH3AL	1	European	SA	Tšuiko et al., 2016
17	Gain	17q12	chr17:36,486,629-37,745,091a	ZNHIT3, MYO19, PIGW, GGNBP2, DHRS11, MRM1, LHX1, AATF, ACACA, C17orf78, TADA2A, DUSP14, SYNRG, DDX52, HNF1B	1	European	SA	Tšuiko et al., 2016
17	Loss	17q21.2	chr17:41,059,240-41,065,879a	Including KRTAP2-3, KRTAP2-4b	2	Unspecified	SA	Norling et al., 2014b
17	Loss	17q21.31 - q21.32	chr17:41,754,052-43,139,095d	10 annotated genes, including NSF	4	East Asian	PA	Liao et al., 2011
18	Gain	18p11.22	chr18:9,474,991-9,615,240a	RALBP1, PPP4R1	1	European	SA	Tšuiko et al., 2016
18	Loss	18q21.31	chr18:59,641,827-59,965,069	CCBE1, PMAIP1	1	Unspecified	PA	McGuire et al., 2011
19	Loss	19p13.3	chr19:1,043,393-2,380,867	67 genes (none previously associated with POI)	1	East Asian	PA	Yuan et al., 2022
19	Loss	19p13.3	chr19:3,769,089-3,801,799a	RAX2, TJP3, ZFR2, MRPL54, APBA3, MATK	1	Unspecified	SA	Norling et al., 2014b
19	Loss	19p13.3	chr19:3,804,024-3,869,038a	ZFR2	1	European	SA	Tšuiko et al., 2016
19	Loss	19q13.33	chr19:47,608,196-47,743,134a	BICRA, EHD2	1	European	SA	Tšuiko et al., 2016
21	Gain	21q21.3	chr21:25,880,535-26,573,286a	APP, CYYR1	1	European	SA	Tšuiko et al., 2016
22	Gain	22q12.3	chr22:37,065,005-37,212,477a	TMPRSS6, IL2RB, C1QTNF6, SSTR3	1	European	SA	Tšuiko et al., 2016
22	Loss	22q13.2	chr22:42,796,502-43,089,427a	ARFGAP3, PACSIN2, TTLL1	1	European	SA	Tšuiko et al., 2016
X	Loss	Xp11.23 - Xp11.22	chrX:48,359,634-52,324,073	65 genes including SSX4, BMP15, AK09637	1	Unspecified	SA	McGuire et al., 2011
X	Gain	Xp22.12	chrX:19,592,049-20,151,446	CXorf23 (BCLAF3), EIF1AX, LOC729609,MAP7D2, MIR23C, RPS6KA3, SCARNA9L, SH3KBP1	3	Near Eastern	SA	Sakka et al., 2022
X	Gain	Xp22.2	chrX:14,634,833-15,261,520	FANCB, ASB9	1	Unspecified	SA	Cozette et al., 2025
X	Gain	Xp22.31	chrX:6,705,838-7,927,739a	PUDP, STS, VCX, PNPLA4	2	European	SA	Tšuiko et al., 2016
X	Loss	Xp22.32 - Xp22.33	chrX:2,691,295-2,890,109a	CD99, XG, GYG2	1	European	SA	Tšuiko et al., 2016
X	Gain	Xp22.33	chrX:1,403,139-1,537,185a	P2RY8, ASMTL	1	Unspecified	SA	Norling et al., 2014b
X	Gain	Xq12	chrX:67,543,353-68,434,120a	AR, OPHN1	1	European	SA	Tšuiko et al., 2016
X	Frequency	Xq21.1 - Xq 21.3.3	chrX:42,310,587-93,897,243	270 genes including POF1B and DIAPH2	5	Near Eastern	Mixed	Lacombe et al., 2006
X	Loss	Xq22.1 - Xq24	chrX:100,671,783-121,050,094a	SYTL4 through GLUD2	1	European	SA	Tšuiko et al., 2016
a Loci extrapolated based on reported associated genes
b It is possible that the identified KRTAP2-3 and KRTAP2-4 deletion is a normal variant in the Swedish population as two controls were also hemizygous
c Statistically significant genotype or allele frequencies
d Original genome assembly not specified
